# Supplementary material for: Derivatives of the β-Crinane Amaryllidaceae Alkaloid Haemanthamine as Multi-Target Directed Ligands for Alzheimer’s Disease
Source: PubMed Central journal article supplement (PMC6480460; doi:10.3390/molecules24071307), 2019-04-03
Supplement: molecules-24-01307-s001.pdf [file molecules-24-01307-s001.pdf]

Supplementary Material for:

# Derivatives of the $\beta$ -crinane Amaryllidaceae Alkaloid Haemanthamine as Multi-Target Directed Ligands for Alzheimer's Disease

Eliška Kohelová <sup>1</sup>, Rozálie Peřinová <sup>1</sup>, Negar Maafi<sup>1</sup>, Jan Korábečný <sup>2,3</sup>, Daniela Hulcová <sup>1,4</sup>, Jana Maříková <sup>5</sup>, Tomáš Kučera <sup>2</sup>, Loreto Martine-Gonzalez <sup>6</sup>, Martina Hrabínova <sup>2</sup>, Katarina Vorčáková <sup>7</sup>, Lucie Nováková <sup>8</sup>, Angela De Simone <sup>9</sup>, Radim Havelek <sup>10</sup>, Lucie Cahlíková <sup>1\*</sup>

<sup>1</sup> ADINACO Research Group, Department of Pharmaceutical Botany, Faculty of Pharmacy, Charles University, Heyrovského 1203, 500 05 Hradec Králové, Czech Republic

<sup>2</sup> Department of Toxicology and Military Pharmacy, Faculty of Military Health Sciences, University of Defence, Třebešská 1575, 500 05 Hradec Králové, Czech Republic

<sup>3</sup> Department Biomedical Research Centre, University Hospital Hradec Kralove, Sokolska 581, 500 05 Hradec Králové, Czech Republic

<sup>4</sup> Department of Pharmacognosy, Faculty of Pharmacy, Charles University, Heyrovského 1203, 500 05 Hradec Králové, Czech Republic

<sup>5</sup> Department of Organic and Bioorganic Chemistry, Faculty of Pharmacy, Charles University, Heyrovského 1203, 500 05 Hradec Králové, Czech Republic

<sup>6</sup> Centro de Investigaciones Biológicas-CSIC, Avenida Ramiro de Maeztu 9, 28040 Madrid, Spain

<sup>7</sup> Department of Biological and Biochemical Sciences, Faculty of Chemical technology, University of Pardubice, Studentská 95, 532 10 Pardubice, Czech Republic

<sup>8</sup> Department of Analytical Chemistry, Faculty of Pharmacy, Charles University, Heyrovského 1203, 500 05 Hradec Králové, Czech Republic

<sup>9</sup> Department for Life Quality Studies, University of Bologna, Corso D'Augusto 237, 47921 Rimini, Italy

<sup>10</sup> Department of Medicinal Biochemistry, Faculty of Medicine, Charles University, Zborovská 2089, 500 03 Hradec Králové, Czech Republic

\* Correspondence: cahlikova@faf.cuni.cz; Tel.: +420-495067311; Fax: +420-495067162

# Analytical spectra of haemanthamine:

## HPLC (UV/VIS)

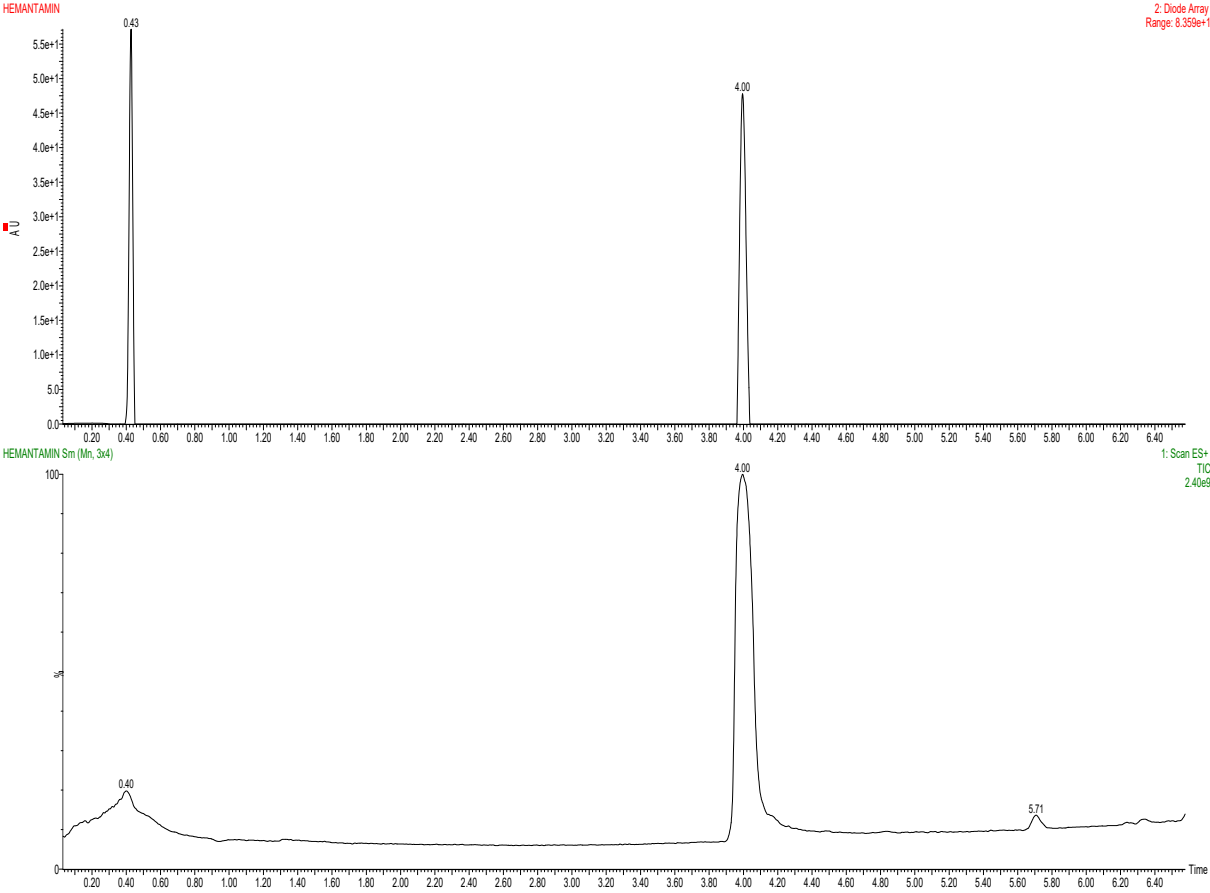

HEMANTAMIN 2395 (3.990)

2: Diode Array  
9.624e-1

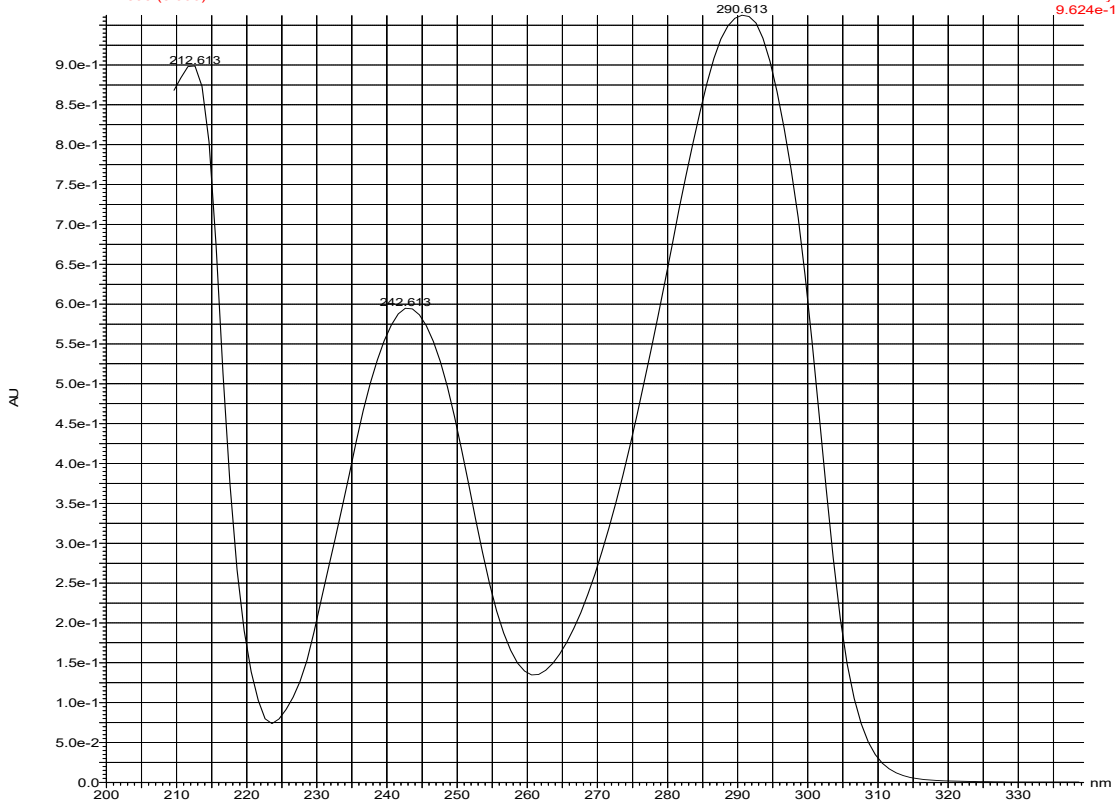

## HPLC/MS

HEMANTAMIN 3664 (3.966) Cm (3635:3699)

1: Scan ES+  
1.33e8

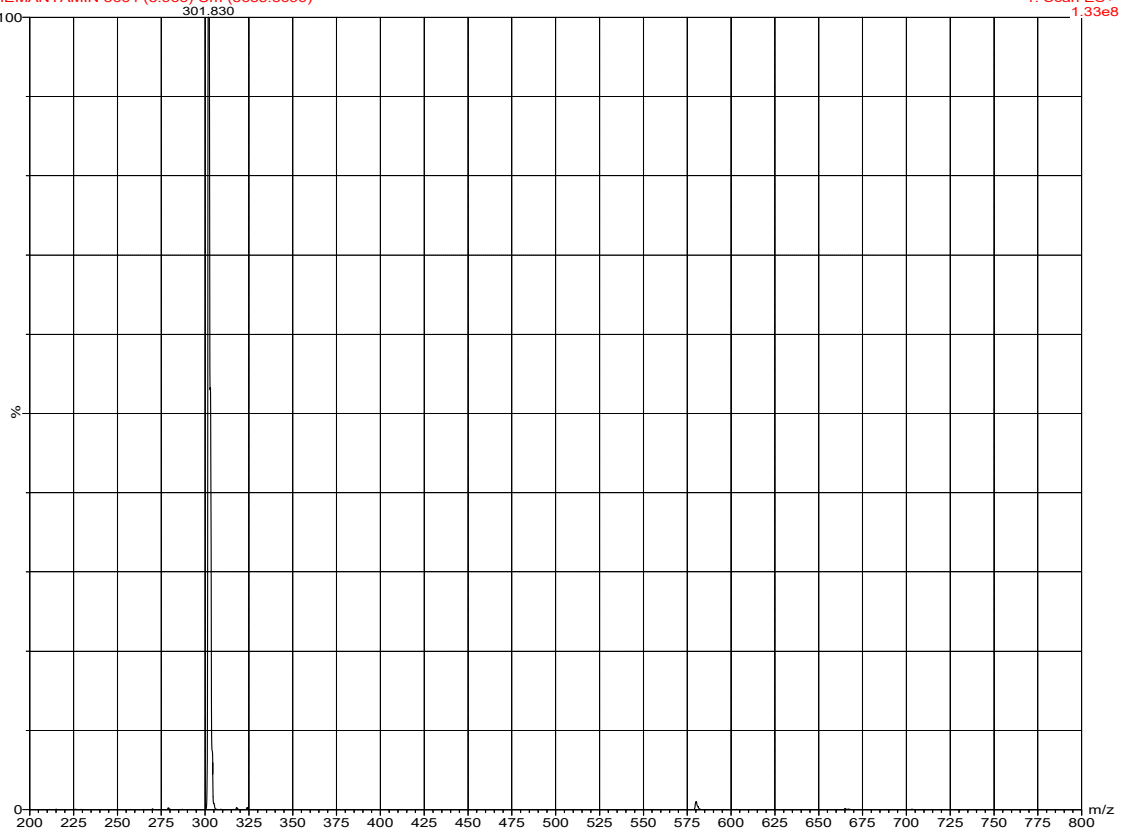

# <sup>1</sup>H-NMR

H.F.1.3

exp701 PROTON

| SAMPLE              |             | PRESATURATION |            |
|---------------------|-------------|---------------|------------|
| date                | Mar 14 2019 | satmode       | n          |
| solvent             | cdcl3       | wet           | n          |
| file                | exp         | SPECIAL       |            |
| ACQUISITION         |             | temp          | 25.0       |
| sw                  | 8012.8      | gain          | 48         |
| at                  | 2.045       | spin          | 20         |
| np                  | 32768       | hst           | 0.008      |
| fb                  | 4000        | pw90          | 8.800      |
| bs                  | 32          | alfa          | 10.000     |
| d1                  | 1.000       | FLAGS         |            |
| nt                  | 8           | il            | n          |
| ct                  | 8           | in            | n          |
| TRANSMITTER         |             | dp            | Y          |
| tn                  | H1          | hs            | nn         |
| sfrq                |             | 499.866       | PROCESSING |
| tof                 | 499.9       | fn            | not used   |
| tpwr                | 60          | DISPLAY       |            |
| pw                  | 4.400       | sp            | 452.7      |
| DECOUPLER           |             | wp            | 3459.1     |
| dn                  | C13         | rfl           | 1007.2     |
| dof                 | 0           | rfp           | 0          |
| dm                  | nnn         | rp            | -131.7     |
| decwave W40_OneNMR- |             | lp            | 0          |
| _W018               |             | PLOT          |            |
| dpwr                | 37          | wc            | 175        |
| dmf                 | 32258       | sc            | 8          |
|                     |             | vs            | 54         |
|                     |             | th            | 7          |
|                     |             | ai            | cdc ph     |

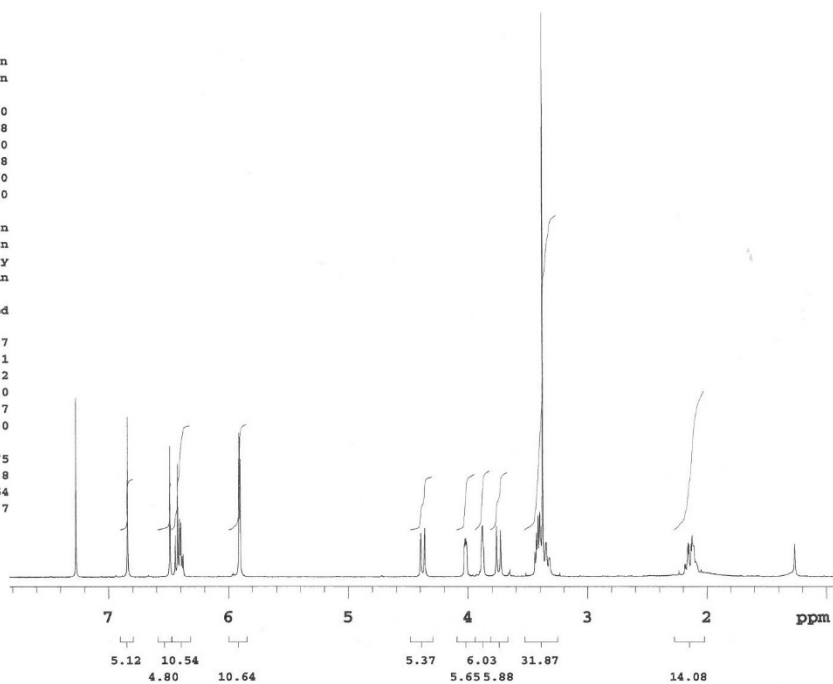

# <sup>13</sup>C-NMR

H.F.1.3

exp701 CARBON

| SAMPLE      |             | PRESATURATION |            |
|-------------|-------------|---------------|------------|
| date        | Mar 14 2019 | satmode       | n          |
| solvent     | cdcl3       | wet           | n          |
| file        | exp         | SPECIAL       |            |
| ACQUISITION |             | temp          | 25.0       |
| sw          | 31250.0     | gain          | 30         |
| at          | 1.049       | spin          | 20         |
| np          | 65536       | hst           | 0.008      |
| fb          | 17000       | pw90          | 11.300     |
| bs          | 1           | alfa          | 10.000     |
| d1          | 1.000       | FLAGS         |            |
| nt          | 2500        | il            | n          |
| ct          | 837         | in            | n          |
| TRANSMITTER |             | dp            | Y          |
| tn          | C13         | hs            | nn         |
| sfrq        |             | 125.705       | PROCESSING |
| tof         | 1913.9      | lb            | 2.50       |
| tpwr        | 55          | fn            | not used   |
| pw          | 5.650       | DISPLAY       |            |
| DECOUPLER   |             | sp            | 2923.3     |
| dn          | H1          | wp            | 16169.5    |
| dof         | 0           | rfl           | 11479.4    |
| dm          | yyy         | rfp           | 9678.2     |
| decwave     |             | w             | -125.3     |
| dpwr        | 40          | lp            | 0          |
| dmf         | 10870       | PLOT          |            |
|             |             | wc            | 175        |
|             |             | sc            | 0          |
|             |             | vs            | 199        |
|             |             | th            | 2          |
|             |             | nm            | cdc ph     |

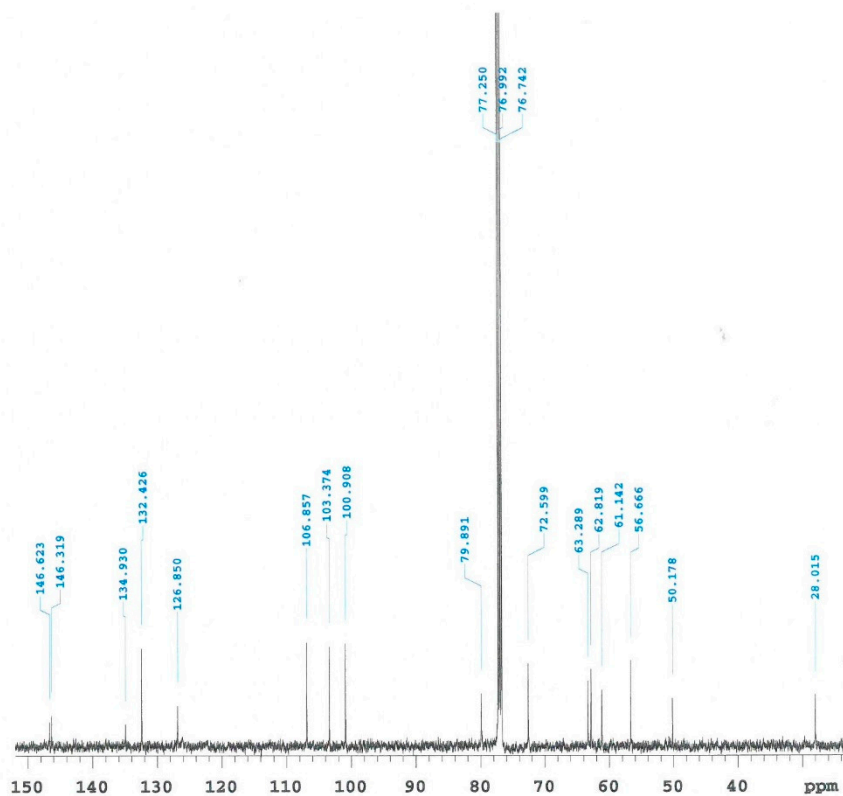



## Analytical spectra of prepared derivatives:

### 11-O-Propionylhaemanthamine (1b)

#### ESI-HRMS

358.1654

2017 11 16 LC-12 INJ1 1048 (1.800) Cm (1041:1059-(859:966+1118:1208))

1: TOF MS ES+  
4.30e6

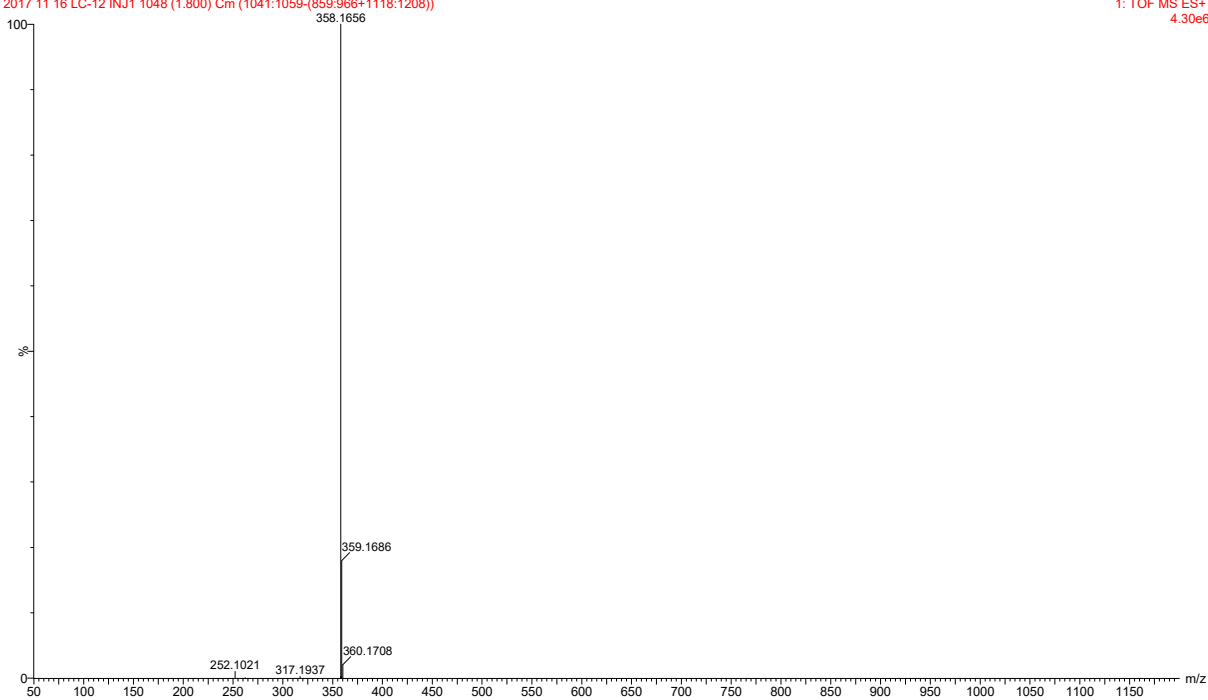

#### EI-MS

File :C:\msdchem\1\data\SNAP\2148LC.D  
Operator :  
Acquired : 21 Apr 2015 15:55 using AcqMethod LUCKA\_7.M  
Instrument : GCMS  
Sample Name: LC-12  
Misc Info :  
Vial Number: 14

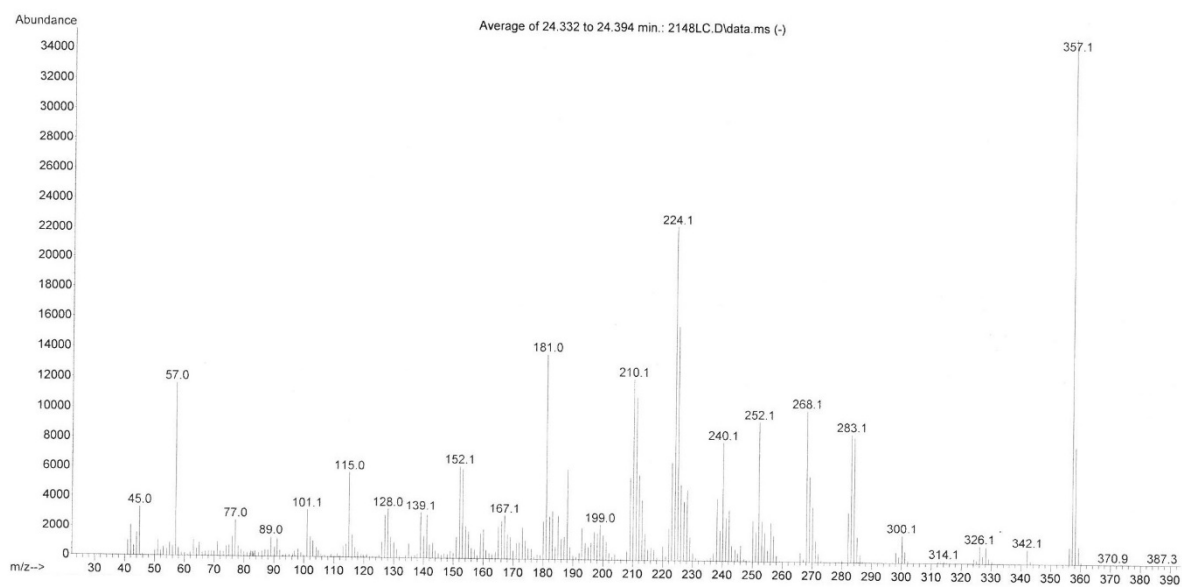

# <sup>1</sup>H-NMR

exp109 PROTON

```
SAMPLE      PRESATURATION
date Aug 4 2015 satmode n
solvent cdcl3 wet n
file /home/vnmr1/v- SPECIAL
nmrsys/data/Lucie/- temp 25.0
Obmeny/LC-12/LC-12- gain 30
.H.fid spin not used
ACQUISITION het 0.008
sw 8012.8 pw90 9.100
at 2.045 alfa 10.000
np 32768 FLAGS
fb 4000 il n
bs 32 in n
dl 1.000 dp y
nt 8 hs nn
ct 8 PROCESSING
TRANSMITTER fn not used
tn H1 DISPLAY
sfrq 499.866 sp 326.5
tof 499.9 wp 3441.5
tpwr 60 rfl 1007.2
pw 4.550 rfp 0
DECOUPLER rp -163.2
dn C13 lp 0
dof 0 PLOT
dm nnn wc 190
decwave W40_OneNMR~ sc 8
_W018 vs 14
dpwr 37 th 7
dmf 32258 ai cdc ph
```

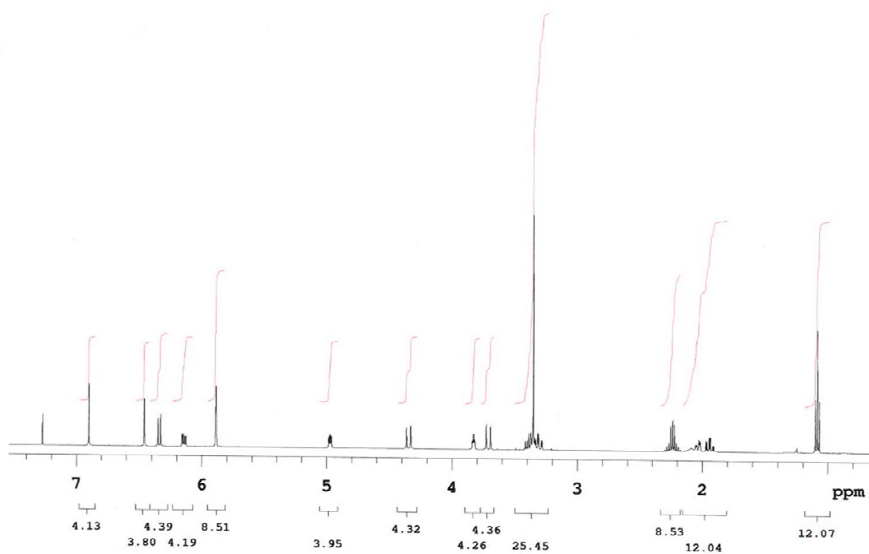

# <sup>13</sup>C-NMR

exp109 CARBON

```
SAMPLE      PRESATURATION
date Aug 4 2015 satmode n
solvent cdcl3 wet n
file /home/vnmr1/v- SPECIAL
nmrsys/data/Lucie/- temp 25.0
Obmeny/LC-12/LC-12- gain 30
.C.fid spin not used
ACQUISITION het 0.008
sw 31250.0 pw90 11.300
at 1.049 alfa 10.000
np 65536 FLAGS
fb 17000 il n
bs 1 in n
dl 1.000 dp y
nt 1500 hs nn
ct 790 PROCESSING
TRANSMITTER lb 0.50
tn C13 fn not used
sfrq 125.705 DISPLAY
tof 1913.9 sp 218.7
tpwr 55 wp 22357.9
pw 5.650 rfl 11482.2
DECOUPLER rfp 9678.2
dn H1 rp 49.3
dof 0 lp 0
dm YYY PLOT
decwave w wc 190
dpwr 41 sc 8
dmf 12346 vs 17
th 4
nm cdc ph
```

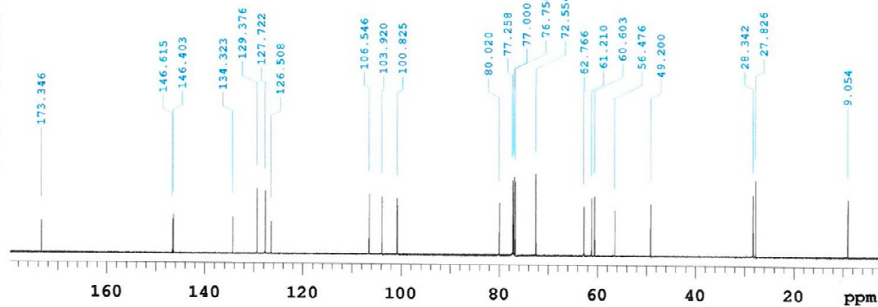

# 11-O-Pentanoylhaemanthamine (1d)

## ESI-HRMS

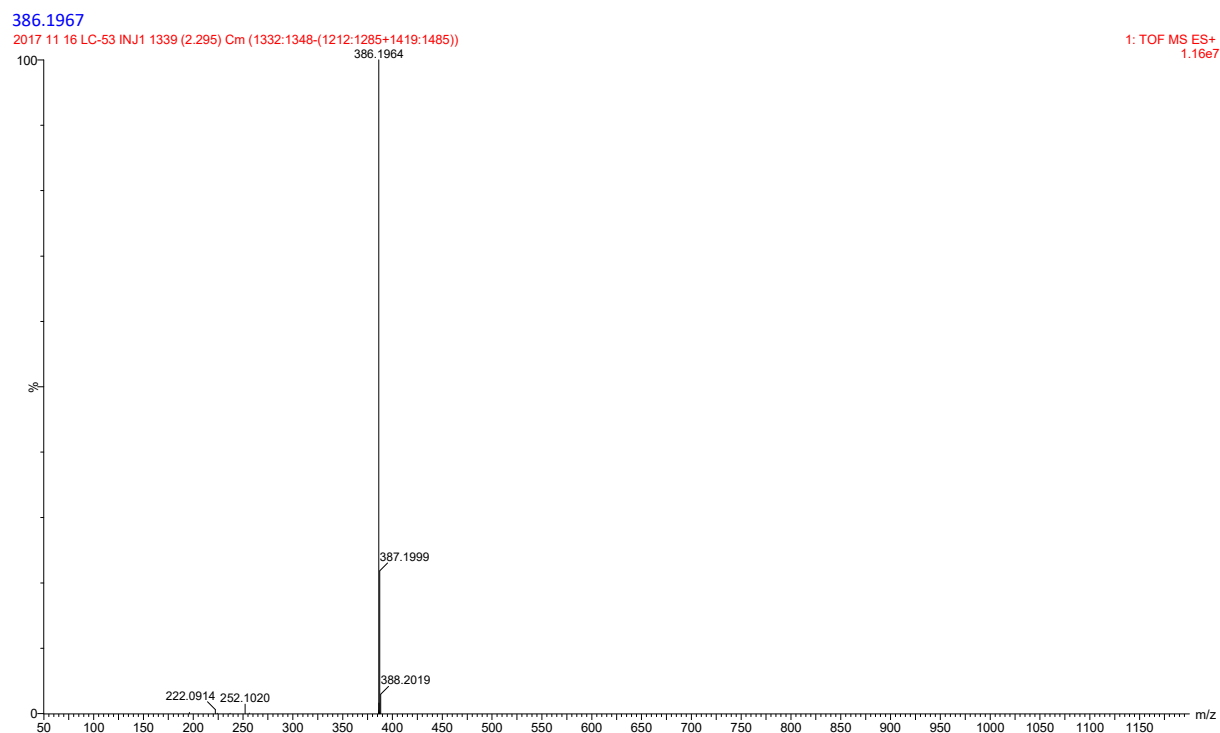

## EI-MS

File : C:\msdchem\1\data\SNAP\3176LC.D  
Operator :  
Acquired : 24 Oct 2016 14:47 using AcqMethod LUCKA\_7.M  
Instrument : GCMS  
Sample Name : LC-53  
Misc Info :  
Vial Number : 8

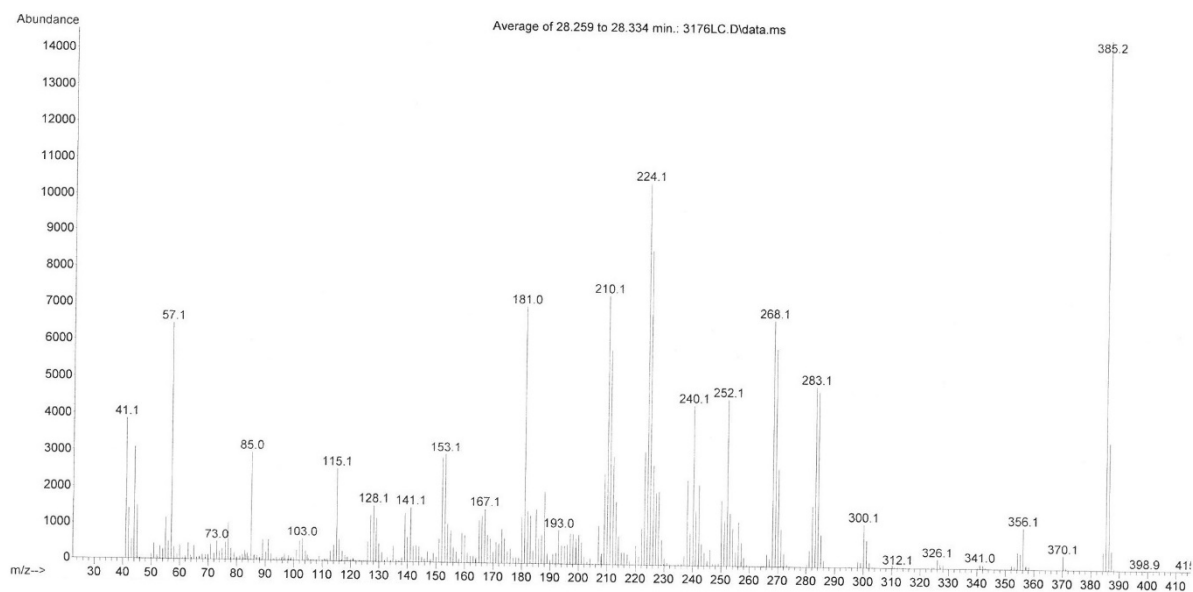



# <sup>1</sup>H-NMR

expl00 PROTON

```
SAMPLE      PRESATURATION
date Apr 4 2017 satmode n
solvent cdcl3 wet n
file exp SPECIAL
ACQUISITION temp 25.0
sw 8012.8 gain 28
at 2.045 spin 20
np 32768 hat 0.008
fb 4000 pw90 9.100
bs 32 alfa 10.000
d1 1.000 FLAGS
nt 8 il n
ct 8 in n
TRANSMITTER dp y
tn H1 hs nn
sfrq 499.866 PROCESSING
tof 499.8 fn not used
tpwr 60 DISPLAY
pw 4.550 sp 284.3
DECOUPLER wp 3523.2
dn C13 rfl 1007.3
dof 0 rfp 0
dm nnn rp -160.2
decwave W40_OneNMR lp 0
          _W018 PLOT
dpwr 37 wc 190
dmf 32258 sc 8
vs 48
th 7
ai cdc ph
```

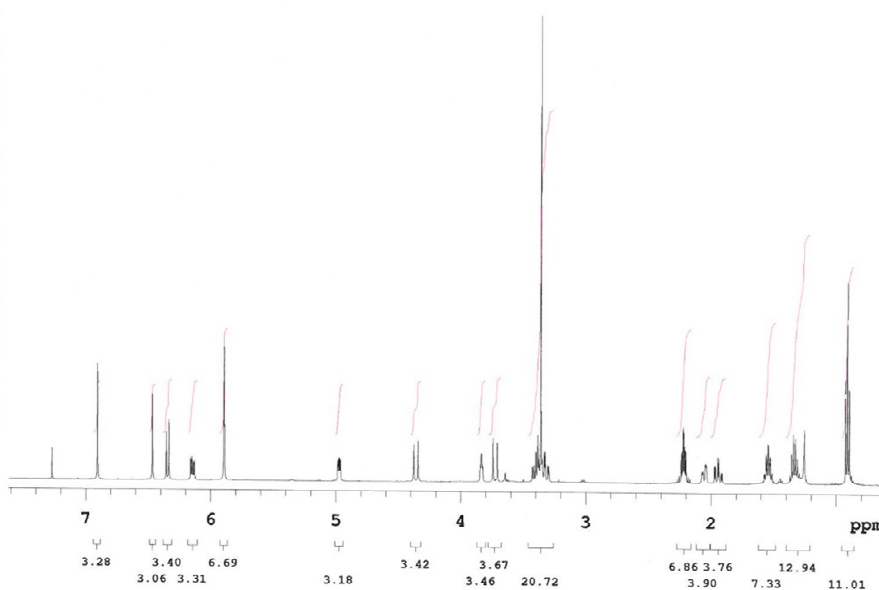

# <sup>13</sup>C-NMR

expl00 CARBON

```
SAMPLE      PRESATURATION
date Apr 4 2017 satmode n
solvent cdcl3 wet n
file exp SPECIAL
ACQUISITION temp 25.0
sw 31250.0 gain 30
at 1.049 spin 20
np 65536 hat 0.008
fb 17000 pw90 11.300
bs 1 alfa 10.000
d1 1.000 FLAGS
nt 1500 il n
ct 750 in n
TRANSMITTER dp y
tn C13 hs nn
sfrq 125.705 PROCESSING
tof 1913.9 lb 0.50
tpwr 55 fn not used
pw 5.650 DISPLAY
DECOUPLER sp 1180.9
dn H1 wp 21351.8
dof 0 rfl 11480.3
dm yyy rfp 9678.2
decwave w rp -177.7
dpwr 40 lp 0
dmf 11173 PLOT
wc 190
sc 0
vs 21
th 3
nm odc ph
```

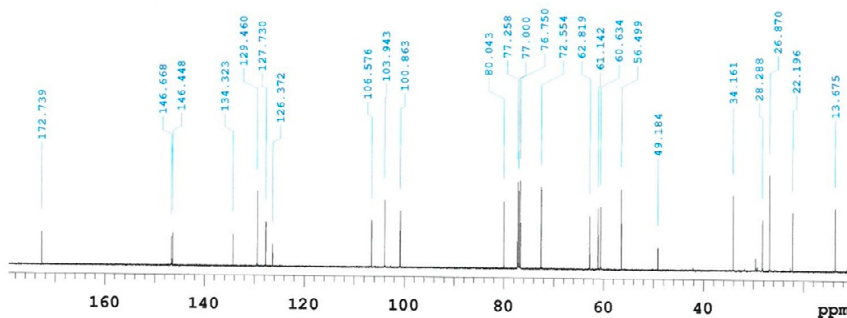

# 11-O-Hexanoylhaemanthamine (1e)

## ESI-HRMS

400.2124

2017 11 16 LC-52 INJ1 1485 (2.543) Cm (1480:1489-(1324:1408+1573:1633))

1: TOF MS ES+  
6.99e6

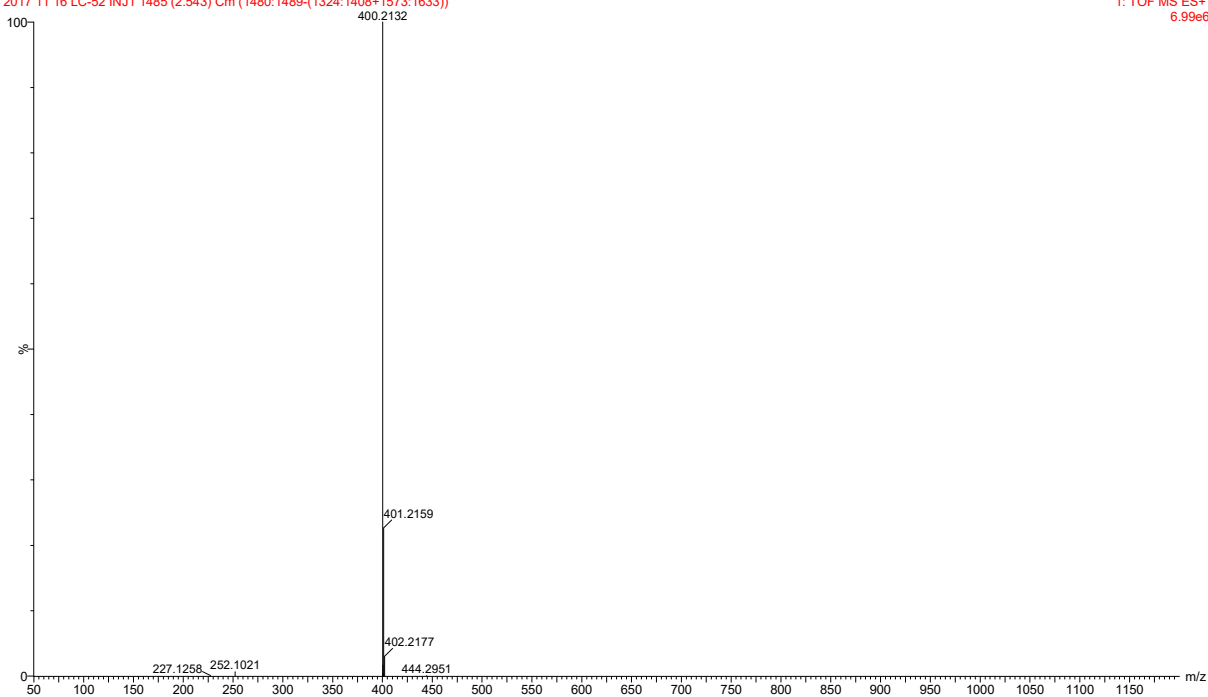

## EI-MS

File : C:\msdchem\1\data\SNAP\3172LC.D  
Operator :  
Acquired : 18 Oct 2016 13:31 using AcqMethod LUCKA\_7.M  
Instrument : GCMS  
Sample Name : LC-52  
Misc Info :  
Vial Number : 5

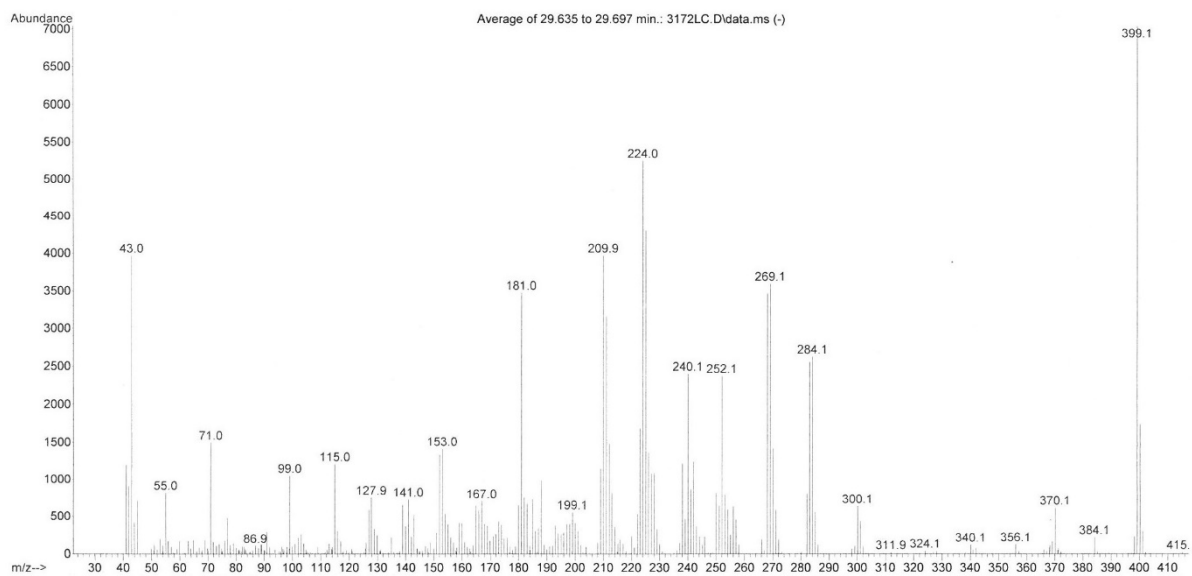

# <sup>1</sup>H-NMR

exp8 PROTON

```
SAMPLE      PRESATURATION
date Mar 21 2017 satmode n
solvent cdcl3 wet n
file /home/vnmr1/v~ SPECIAL
nmrsys/data/Lucie/~ temp 25.0
Obmeny/LC-52_H_fid gain 28
ACQUISITION spin 20
sw 8012.8 hst 0.008
at 2.045 pw90 9.100
np 32768 alfa 10.000
fb 4000
bs 32 il n
dl 1.000 in n
nt 8 dp y
ct 8 hs nn

TRANSMITTER PROCESSING
tn H1 fn not used
sfrq 499.866 DISPLAY
tof 499.9 sp 223.3
tpwr 60 wp 3600.0
pw 4.550 rfl 1007.2
DECOUPLER rfp 0
dn C13 rp 161.8
dof 0 lp 0
dm nnn PLOT
decwave W40_OneNMR- wc 190
_M018 sc 8
dpwr 37 vs 34
dmf 32258 th 7
ai cdc ph
```

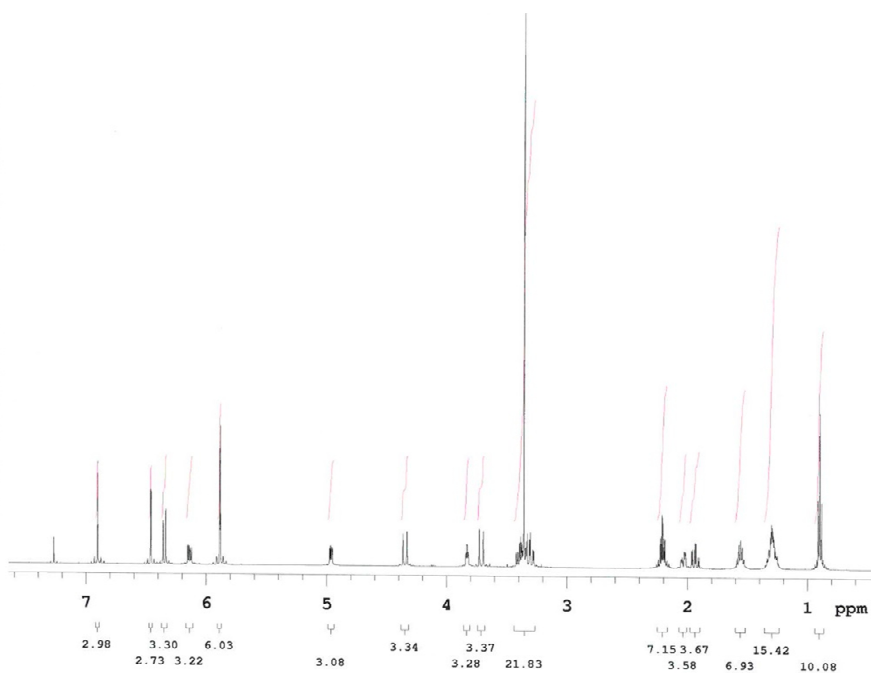

# <sup>13</sup>C-NMR

exp8 CARBON

```
SAMPLE      PRESATURATION
date Mar 21 2017 satmode n
solvent cdcl3 wet n
file /home/vnmr1/v~ SPECIAL
nmrsys/data/Lucie/~ temp 25.0
Obmeny/LC-52_C_fid gain 30
ACQUISITION spin 20
sw 31250.0 hst 0.008
at 1.049 pw90 11.300
np 65536 alfa 10.000
fb 17000
bs 1 il n
dl 1.000 in n
nt 1000 dp y
ct 703 hs nn

TRANSMITTER PROCESSING
tn C13 lb 0.50
sfrq 125.705 fn not used
tof 1913.9 DISPLAY
tpwr 55 sp 955.9
pw 5.650 wp 21457.7
DECOUPLER rfl 11481.3
dn H1 rfp 9678.2
dof 0 rp 133.9
dm vvy lp 0
decwave w PLOT
dpwr 40 wc 190
dmf 11173 sc 8
vs 20
th 2
nm odc ph
```

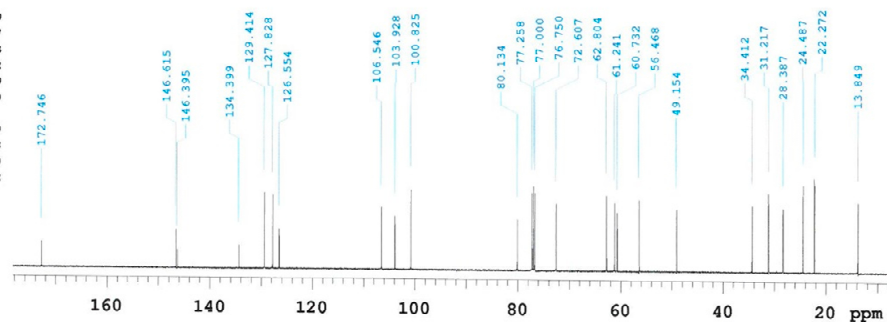

# 11-O-Butanoylhaemanthamine (1f)

## EI-MS

File :C:\msdchem\1\data\SNAP\3444LC.D  
Operator : Lucka  
Acquired : 24 Mar 2017 13:19 using AcqMethod LUCKA\_7.M  
Instrument : GCMS  
Sample Name: JM-1  
Misc Info :  
Vial Number: 8

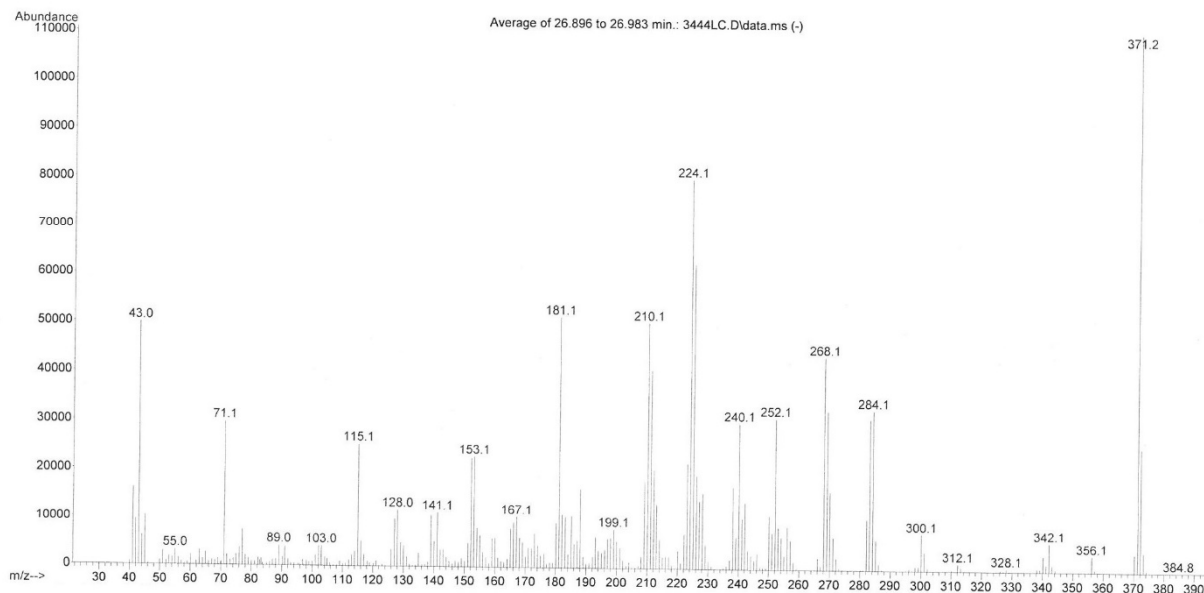

## <sup>1</sup>H-NMR

exp9 PROTON

```
SAMPLE      PRESATURATION
date Nov 10 2015 satmode n
solvent cdcl3 wet n
file /home/vnmr1/v- SPECIAL
nmrsys/data/Zalohy- temp 25.0
/Hrabalek-160825/N- gain 30
emecek_Jan/Botanic- spin not used
a/JM-1_H_fid hat 0.008
ACQUISITION pw90 9.100
sw 8012.8 alfa 10.000
at 2.045
np 32768 il
fb 4000 in
bs 32 dp
dl 1.000 hs
nt 8
ct 8 fn not used
PROCESSING
TRANSMITTER DISPLAY
tn H1 sp 340.5
sfrq 499.866 wf 3372.1
tof 499.9 rfl 4642.7
tpwr 60 rfp 3629.0
pw 4.550 rp 1.8
DECOUPLER lp 0
dn C13
dof 0 wc 190
dm nnn sc 8
decwave W40_OneNMR- vs 59
_W018 th 7
dpwr 37 ai cdc ph
dmf 32258
```

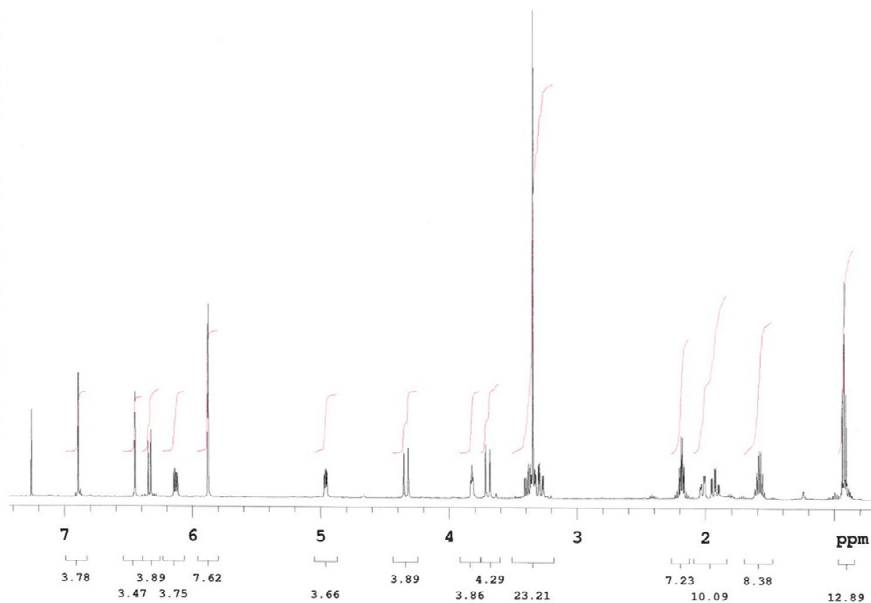

# <sup>13</sup>C-NMR

exp9 CARBON

| SAMPLE              |                | PRESATURATION |          |
|---------------------|----------------|---------------|----------|
| date                | Nov 10 2015    | satmode       | n        |
| solvent             | cdcl3          | wet           | n        |
| file                | /home/vnmr1/v- | SPECIAL       |          |
| nmrsys/data/Zalchy- |                | temp          | 25.0     |
| /Hrabalek-160825/N- |                | gain          | 30       |
| emecek_Jan/Botank-  |                | spin          | not used |
| a/JM-1.C.fid        |                | hst           | 0.008    |
| ACQUISITION         |                | pw90          | 11.300   |
| sw                  | 31250.0        | alfa          | 10.000   |
| at                  | 1.049          | ELAGS         |          |
| np                  | 65536          | il            | n        |
| fb                  | 17000          | in            | n        |
| bs                  | 1              | dp            | y        |
| d1                  | 1.000          | hs            | nn       |
| nt                  | 1000           | PROCESSING    |          |
| ct                  | 345            | lb            | 1.00     |
| TRANSMITTER         |                | fn            | not used |
| tn                  | C13            | DISPLAY       |          |
| sfrq                | 125.705        | sp            | 934.9    |
| tof                 | 1913.9         | wp            | 21648.4  |
| tpwr                | 55             | rfl           | 11480.3  |
| pw                  | 5.650          | rfl           | 9678.2   |
| DECOUPLER           |                | rp            | -183.6   |
| dn                  | H1             | lp            | 0        |
| dof                 | 0              | PLOT          |          |
| dm                  | yyy            | wc            | 190      |
| decwave             | w              | sc            | 8        |
| dpwr                | 41             | vs            | 22       |
| dmf                 | 12346          | th            | 2        |
|                     | nm             | cdc           | ph       |

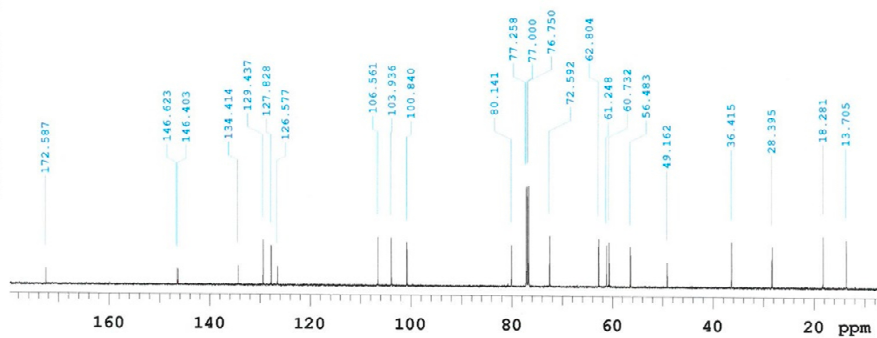

## 11-O-Benzoylhaemanthamine (1g)

### ESI-HRMS

406.1654

2017 11 16 NH-255 INJ1 1322 (2.268) Cm (1316:1331-(1203:1280+1405:1484))

1: TOF MS ES+  
8.1166

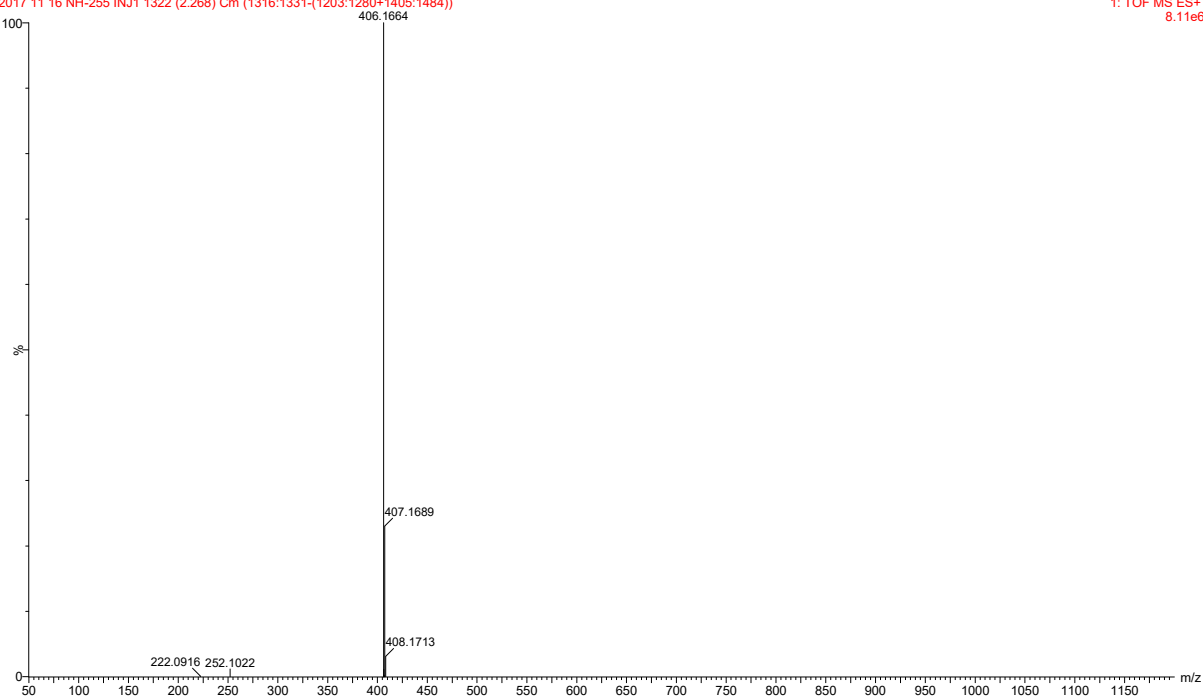

# EI-MS

File : C:\msdchem\1\data\SNAP\3828LC.D  
Operator : Lucka  
Acquired : 17 Jan 2018 10:14 using AcqMethod LUCKA\_7.M  
Instrument : GCMS  
Sample Name: LC-118  
Misc Info :  
Vial Number: 13

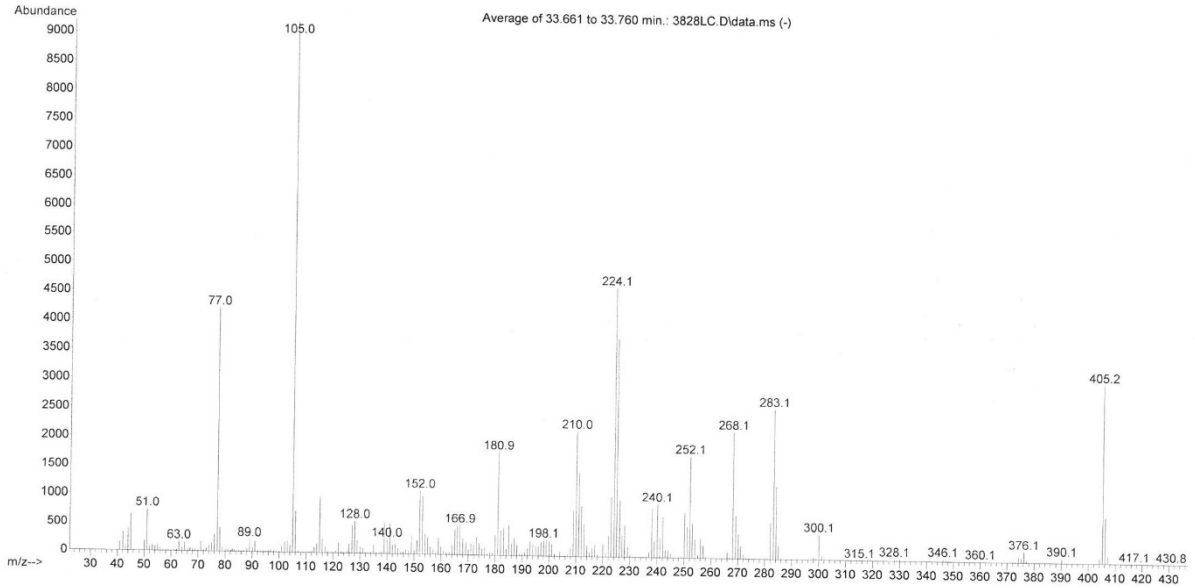

# <sup>1</sup>H-NMR

exp39 PROTON

| SAMPLE              |                                   | PRESATURATION |           |
|---------------------|-----------------------------------|---------------|-----------|
| date                | Jan 23 2018                       | satmode       | n         |
| solvent             | cdcl3                             | wet           | n         |
| file                | /home/vmr1/v-nmr/sys/data/Lucie/- | SPECIAL       | temp 25.0 |
| Obmeny/LC-118_Ha.f- | gain                              | 24            |           |
|                     | id                                | spin          | 20        |

  

| ACQUISITION |        |      |        |
|-------------|--------|------|--------|
| sw          | 8012.8 | hst  | 0.008  |
| at          | 2.045  | pw90 | 8.700  |
| np          | 32768  | alfa | 10.000 |

  

| FLAGS |       |    |    |
|-------|-------|----|----|
| fb    | 4000  | il | n  |
| bs    | 32    | in | n  |
| d1    | 1.000 | dp | y  |
| nt    | 8     | hs | nn |
| ct    | 8     |    |    |

  

| TRANSMITTER |    | PROCESSING |          |
|-------------|----|------------|----------|
| tn          | H1 | fn         | not used |

  

| DISPLAY |         |     |        |
|---------|---------|-----|--------|
| sfrq    | 499.866 | sp  | 507.9  |
| tof     | 499.9   | wp  | 3689.0 |
| tpwr    | 60      | rf1 | 1007.2 |
| pw      | 4.350   | rpf | 0      |

  

| DECOUPLER |             | PLOT |        |
|-----------|-------------|------|--------|
| dn        | C13         | lp   | 0      |
| dof       | 0           |      |        |
| dm        | nnn         | wc   | 175    |
| decwave   | W40_OneNMR- | sc   | 8      |
|           | _W018       | vs   | 43     |
| dpwr      | 37          | th   | 7      |
| dmf       | 32258       | ai   | cdc ph |

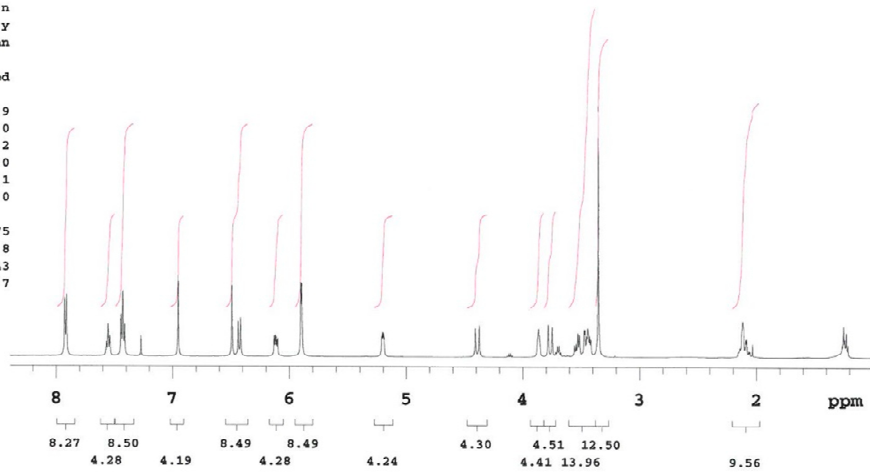

# <sup>13</sup>C-NMR

exp39 CARBON

| SAMPLE              |                                   | PRESATURATION |          |
|---------------------|-----------------------------------|---------------|----------|
| date                | Jan 23 2018                       | satmode       | n        |
| solvent             | cdcl3                             | wet           | n        |
| file                | /home/vmml/v-nmr/sys/data/lacie/- | SPECIAL       |          |
| Olmeny/LC-118_Ca.f- | gain                              | 25.0          |          |
| id                  | spin                              | 30            |          |
| 20                  |                                   |               |          |
| ACQUISITION         |                                   | FLAGS         |          |
| sw                  | 31250.0                           | hst           | 0.008    |
| at                  | 1.049                             | pw90          | 11.300   |
| np                  | 65536                             | alfa          | 10.000   |
| fb                  | 17000                             | il            | n        |
| bs                  | 1                                 | in            | n        |
| dl                  | 1.000                             | dp            | y        |
| nt                  | 1000                              | hs            | nn       |
| ct                  | 565                               |               |          |
| TRANSMITTER         |                                   | PROCESSING    |          |
| tn                  | C13                               | lb            | 0.50     |
| sfrq                | 125.705                           | fn            | not used |
| tof                 | 1913.9                            | sp            | 2964.3   |
| pwpr                | 55                                | wp            | 18764.5  |
| tpw                 | 5.650                             | rfl           | 11488.0  |
| DECOUPLER           |                                   | rfp           |          |
| dn                  | H1                                | rp            | -168.1   |
| dof                 | 0                                 | lp            | 0        |
| dm                  | yyy                               |               |          |
| PLOT                |                                   |               |          |
| decwave             | w                                 | wc            | 175      |
| dpwr                | 40                                | sc            | 8        |
| dmf                 | 11050                             | vs            | 48       |
|                     |                                   | th            | 3        |
|                     |                                   | nm            | cdc ph   |

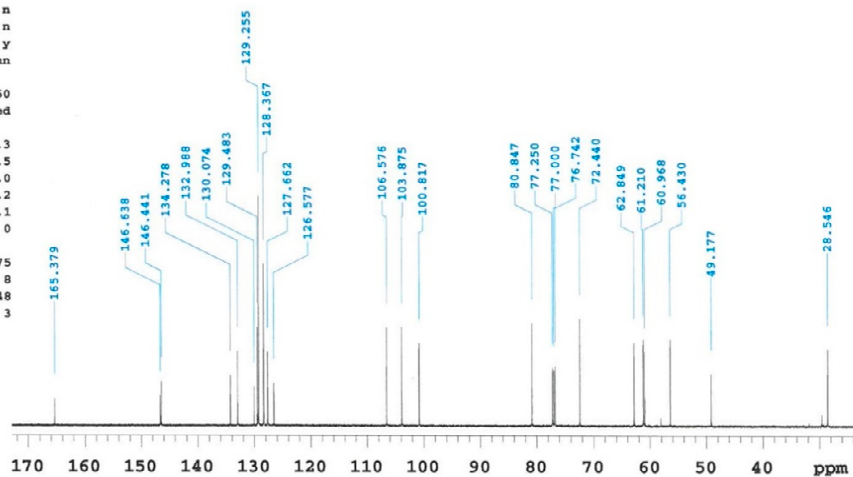

## 11-O-(3-chlorobenzoyl)haemanthamine (1h)

### ESI-HRMS

440.1265

2017 11 16 NH-257 INJ1 1486 (2.548) Cm (1481:1497-(1290:1426+1565:1644))

1: TOF MS ES+  
5.07e6

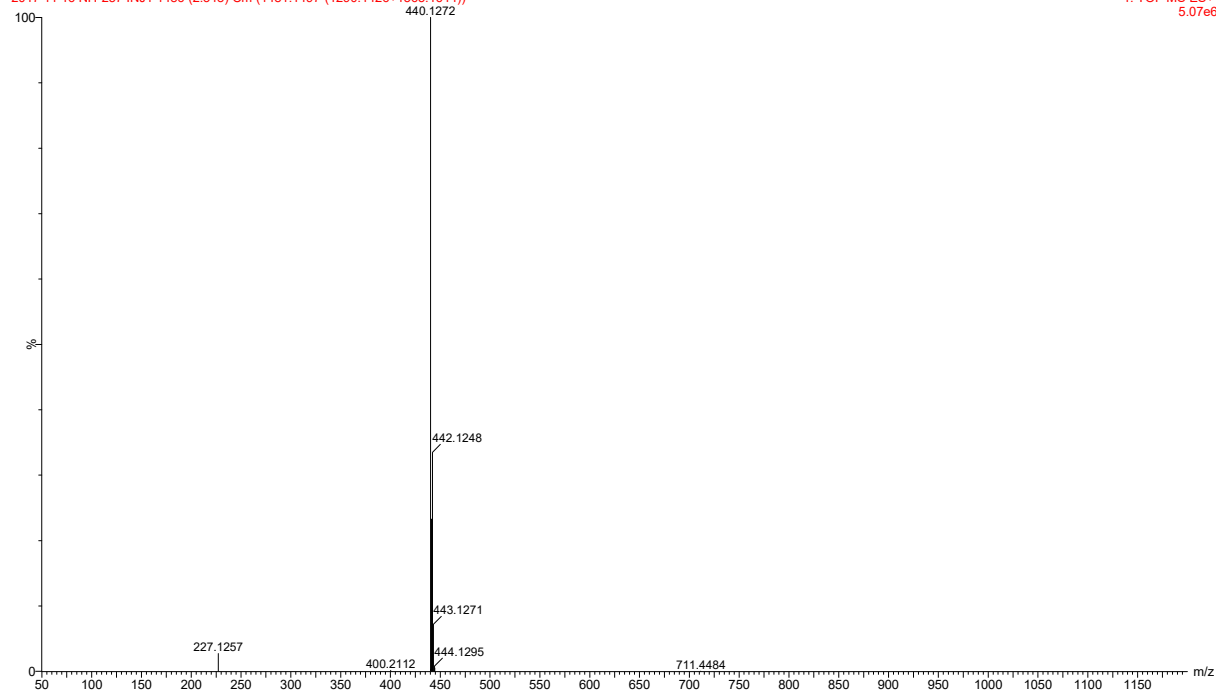

# EI-MS

File :C:\msdchem\1\data\SNAP\3643LC.D  
Operator :  
Acquired : 19 Oct 2017 13:55 using AcqMethod LUCKA\_7.M  
Instrument : GCMS  
Sample Name: LC-91  
Misc Info :  
Vial Number: 12

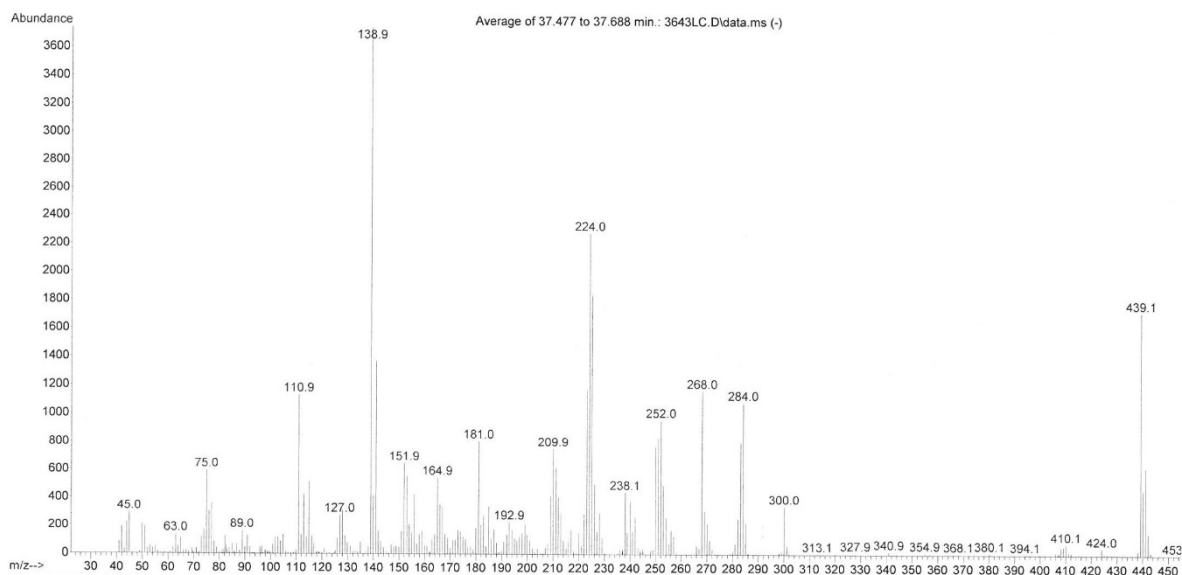

# <sup>1</sup>H-NMR

exp109 PROTON

| SAMPLE              |                | PRESATURATION |          |
|---------------------|----------------|---------------|----------|
| date                | Mar 2 2016     | satmode       | n        |
| solvent             | cdcl3          | wet           | n        |
| file                | /home/vrmr1/v- | SPECIAL       |          |
| nmrsys/data/Zalohy- | temp           | 25.0          |          |
| /2016/Hrabalek-160- | gain           | 30            |          |
| 825/Nemocek Jan/Bo- | spin           | not used      |          |
| tanika/HN-257-B2_H- | ht             | 0.008         |          |
|                     | fid            | pw90          | 9.100    |
|                     | acq            | aifa          | 10.000   |
| ACQUISITION         |                |               |          |
| sw                  | 8012.8         | FLAGS         |          |
| at                  | 2.045          | il            | n        |
| np                  | 32768          | in            | n        |
| fb                  | 4000           | dp            | y        |
| bs                  | 32             | hs            | nn       |
| d1                  | 1.000          | PROCESSING    |          |
| nt                  | 8              | fn            | not used |
| ct                  | 8              | DISPLAY       |          |
| TRANSMITTER         |                |               |          |
| tn                  | H1             | wp            | 3808.8   |
| sfrq                | 499.866        | rfl           | 1007.2   |
| tof                 | 499.9          | rfp           | 0        |
| tpwr                | 60             | rp            | 30.5     |
| pw                  | 4.550          | lp            | 0        |
| DECOUPLER           |                |               |          |
| dn                  | C13            | wc            | 190      |
| dof                 | 0              | sc            | 8        |
| dm                  | nnn            | vs            | 24       |
| decwave             | W40_OneNMR-    | th            | 7        |
|                     | _W018          | ai            | cdc      |
| dpwr                | 37             | ph            |          |
| dmf                 | 32258          |               |          |

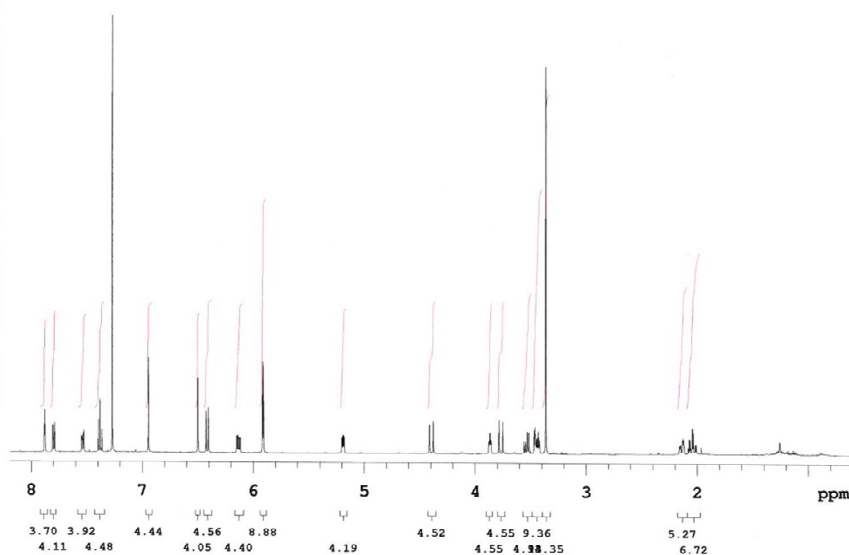



# <sup>13</sup>C-NMR

exp109 CARBON

```
SAMPLE          PRESATURATION
date   Mar 2 2016  satmode      n
solvent cdcl3      wet         n
file /home/vnmr1/v- SPECIAL
nmrsys/data/Zalohy- temp      25.0
/2016/Hrabalok-160- gain      30
825/Namecek-Jan/Bo- spin      not used
tanika/RN-257-B2_C- hst       0.008
.fid pw90         11.300
ACQUISITION     alfa         10.000
sw 31250.0      FLAGS
at 1.049       il          n
np 65536       in          n
fb 17000       dp          y
bs 1           hs          nn
dl 1.000      PROCESSING
nt 1000       lb          0.50
ct 430       fn          not used
TRANSMITTER     DISPLAY
tn C13        sp         2805.1
sfrq 125.705  wp         18899.0
tof 1913.9   rfl         11482.2
tpwr 55      rfp         9678.2
pw 5.650    rp          18.7
DECOUPLER      lp          0
dn H1        H1         PLOT
dof 0        wc         190
dm yyy       sc          8
decwave w     vs         29
dprc 41     th          3
dmf 12346   nm         cdc ph
```

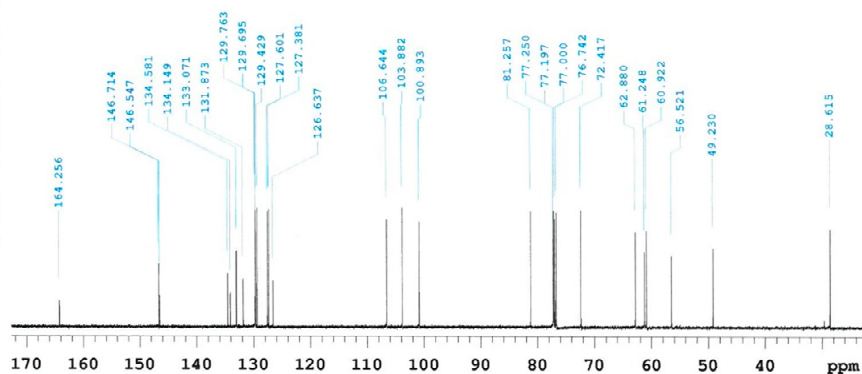

## 11-O-(3-bromobenzoyl)haemanthamine (1i)

### ESI-HRMS

484.0760

2017 11 16 LC-58 INJ1 1517 (2.599) Cm (1510:1528-(1361:1449+1591:1699))

1: TOF MS ES+  
1.28e7

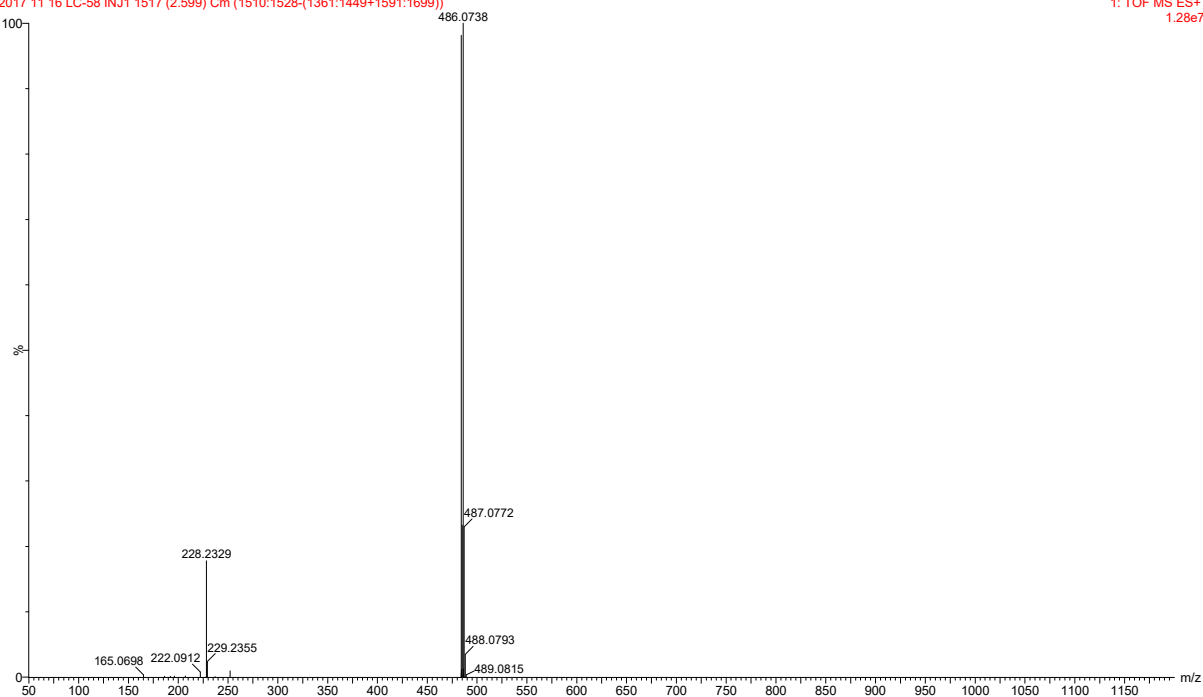

484.0760

2017 11 16 LC-58 INJ1 1517 (2.599) Cm (1510:1528-(1361:1449+1591:1699))

1: TOF MS ES+  
1.2867

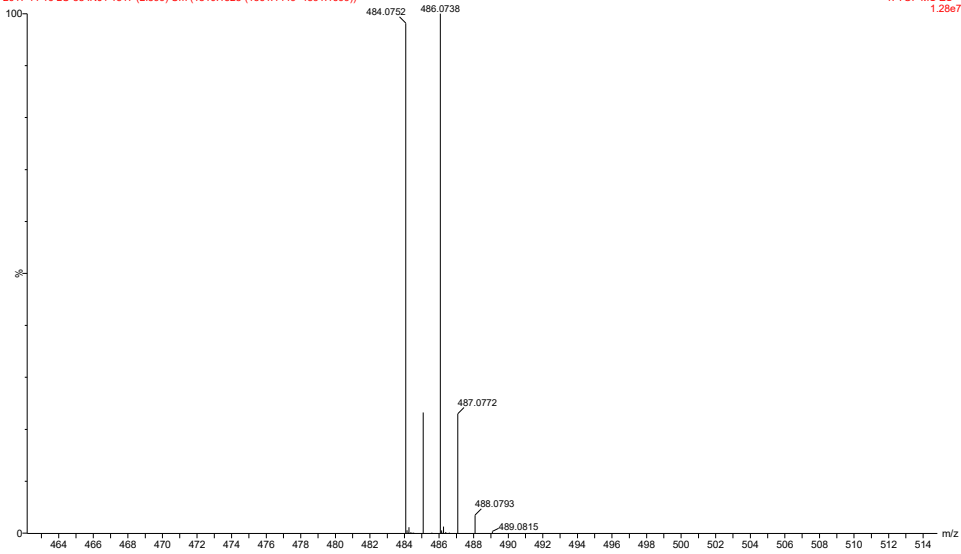

## EI-MS

File :C:\msdchem\1\data\SNAP\3857LC.D  
Operator : Lucka  
Acquired : 25 Jan 2018 15:19 using AcqMethod LUCKA\_7.M  
Instrument : GCMS  
Sample Name: LC-58  
Misc Info :  
Vial Number: 7

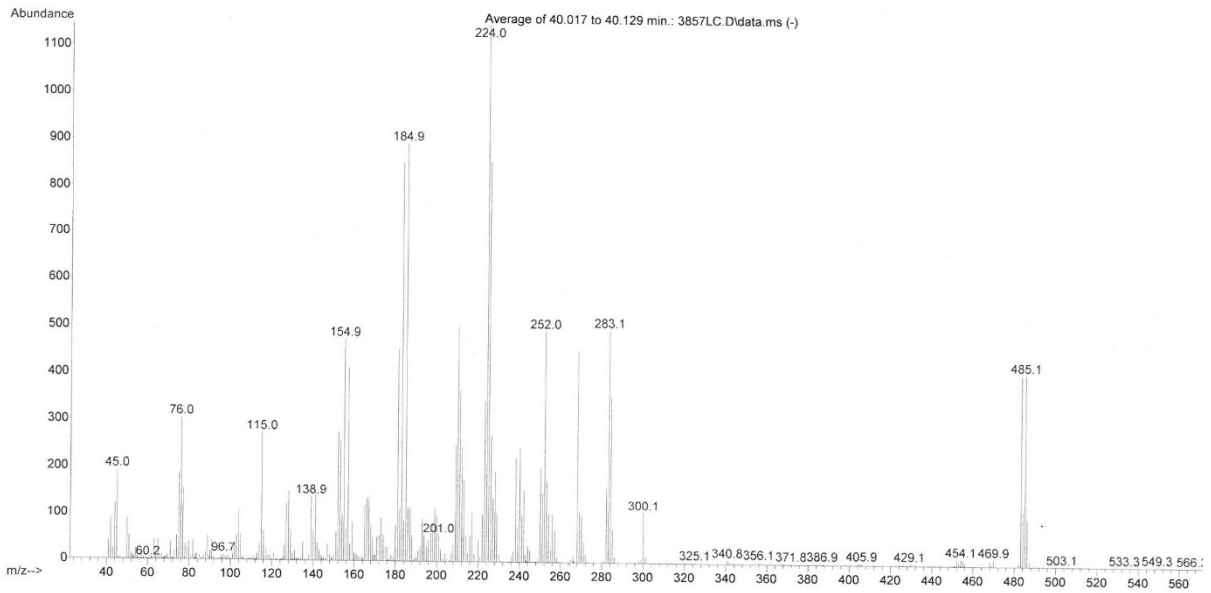

# <sup>1</sup>H-NMR

expl08 PROTON

| SAMPLE      |                  | PRESATURATION |          |
|-------------|------------------|---------------|----------|
| date        | Apr 24 2017      | satmode       | n        |
| solvent     | cdcl3            | wet           | n        |
| file        | exp              | SPECIAL       |          |
| ACQUISITION |                  | temp          |          |
| sw          | 8012.8           | gain          | 26       |
| at          | 2.045            | spin          | 20       |
| np          | 32768            | hst           | 0.008    |
| fb          | 4000             | pw90          | 9.100    |
| bs          | 32               | alfa          | 10.000   |
| dl          | 1.000            | FLAGS         |          |
| nt          | 8                | il            | n        |
| ct          | 8                | in            | n        |
| TRANSMITTER |                  | dp            |          |
| tn          | H1               | hs            | nn       |
| sfrq        | 499.866          | PROCESSING    |          |
| tof         | 499.9            | fn            | not used |
| tpwr        | 60               | DISPLAY       |          |
| pw          | 4.550            | sp            | 420.9    |
| DECOUPLER   |                  | wp            | 3753.6   |
| dn          | C13              | zfl           | 1007.2   |
| dof         | 0                | rfl           | 0        |
| dm          | nnn              | rp            | 56.5     |
| decwave     | W40_OneNMR~_W018 | lp            | 0        |
| PLOT        |                  | wc            | 200      |
| dpwr        | 37               | sc            | 8        |
| dmf         | 32258            | vs            | 32       |
|             |                  | th            | 7        |
|             |                  | ai            | cdc ph   |

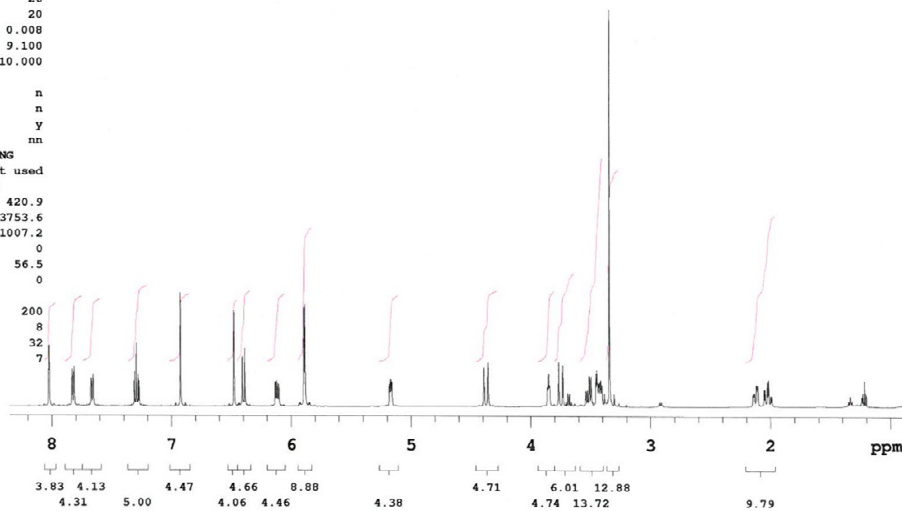

# <sup>13</sup>C-NMR

expl09 CARBON

| SAMPLE      |             | PRESATURATION |          |
|-------------|-------------|---------------|----------|
| date        | Apr 24 2017 | satmode       | n        |
| solvent     | cdcl3       | wet           | n        |
| file        | exp         | SPECIAL       |          |
| ACQUISITION |             | temp          |          |
| sw          | 31250.0     | gain          | 30       |
| at          | 1.049       | spin          | 20       |
| np          | 65536       | hst           | 0.008    |
| fb          | 17000       | pw90          | 11.300   |
| bs          | 1           | alfa          | 10.000   |
| dl          | 1.000       | FLAGS         |          |
| nt          | 1000        | il            | n        |
| ct          | 275         | in            | n        |
| TRANSMITTER |             | dp            |          |
| tn          | C13         | hs            | nn       |
| sfrq        | 125.705     | PROCESSING    |          |
| tof         | 1913.9      | lb            | 1.00     |
| tpwr        | 55          | fn            | not used |
| pw          | 5.650       | DISPLAY       |          |
| DECOUPLER   |             | sp            | 2891.8   |
| dn          | H1          | wp            | 18541.3  |
| dof         | 0           | rfl           | 11489.9  |
| dm          | yyy         | rfl           | 9678.2   |
| decwave     | w           | rp            | 139.9    |
| dpwr        | 40          | lp            | 0        |
| dmf         | 11173       | PLOT          |          |
|             |             | wc            | 200      |
|             |             | sc            | 0        |
|             |             | vs            | 21       |
|             |             | th            | 2        |
|             |             | nm            | cdc ph   |

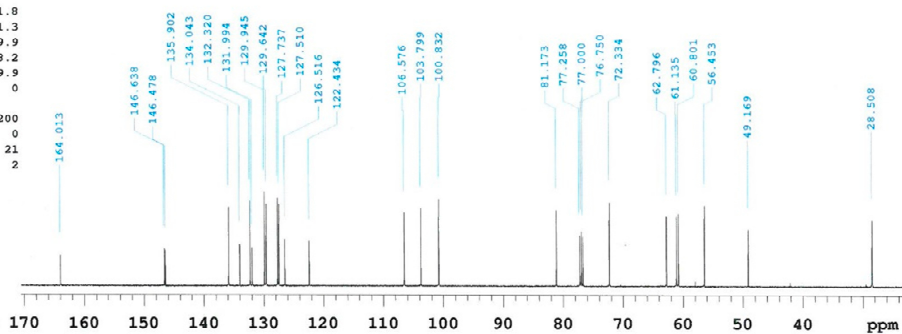

# 11-O-(2-methylbenzoyl)haemanthamine (1j)

## ESI-HRMS

420.1733

2017 11 16 NH-278 INJ1 1441 (2.469) Cm (1435:1450-(1270:1367+1519:1600))

1: TOF MS ES+  
1.21e7

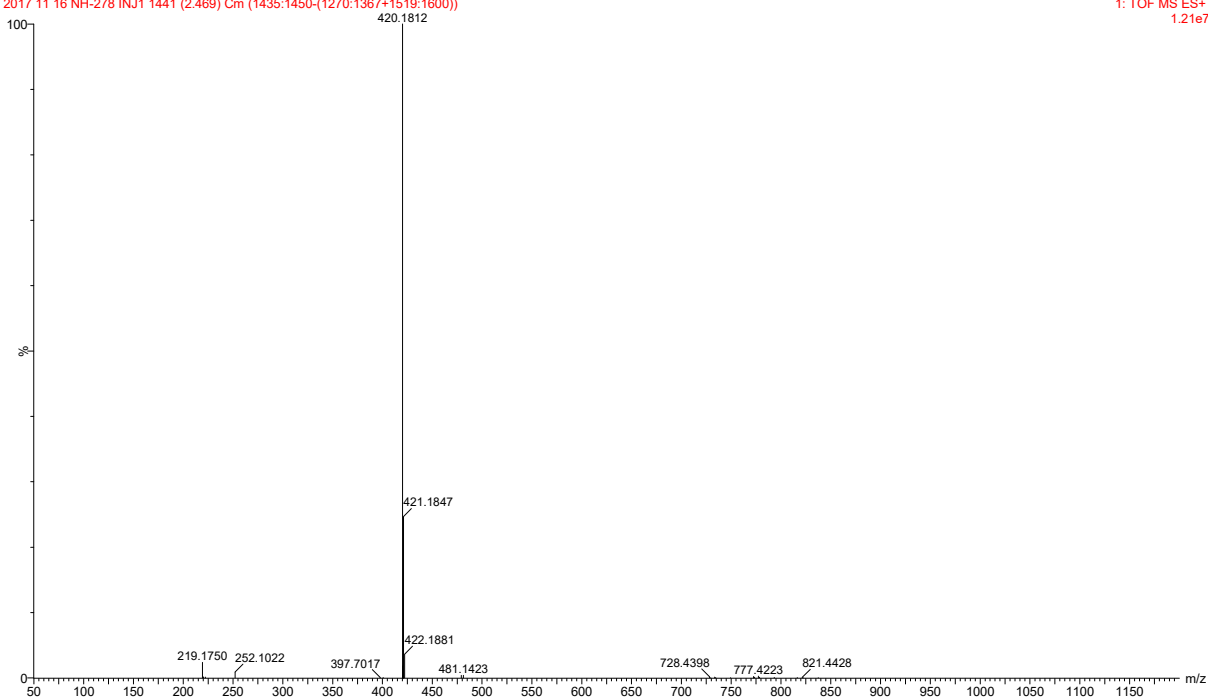

## EI-MS

File :C:\msdchem\1\data\SNAP\3639LC.D  
Operator :  
Acquired : 17 Oct 2017 9:58 using AcqMethod LUCKA\_7.M  
Instrument : GCMS  
Sample Name: LC-90  
Misc Info :  
Vial Number: 9

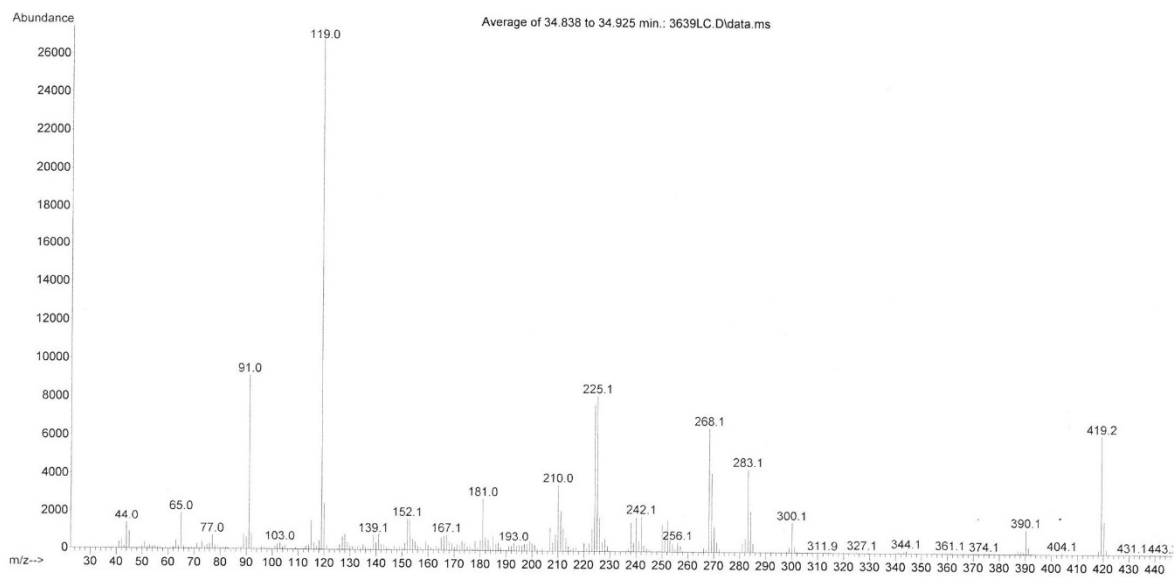

# <sup>1</sup>H-NMR

exp50 PROTON

```
SAMPLE      PRESATURATION
date Jun 27 2016 satmode n
solvent cdcl3 wet n
file /home/vnmr1/v- SPECIAL
nmrsys/data/Zalchy- temp 25.0
/2016/Hrabalek-160- gain 28
825/Nemecek_Jan/Bo- spin 20
tanika/HN-278A_H.f- hst 0.008
id pw90 9.100
ACQUISITION alfa 10.000
sw 8012.8 FLAGS
at 2.045 il n
np 32768 in n
fb 4000 dp y
bs 32 hs nn
d1 1.000 PROCESSING
nt 8 fn not used
ct 8 DISPLAY
TRANSMITTER sp 956.4
tn H1 vp 3017.0
sfrq 499.866 rfl 1007.2
tof 499.9 rfp 0
tpwr 60 rp -111.3
pw 4.550 lp 0
DECOUPLER PLOT
dn C13 wc 175
dof 0 sc 8
dm nnn vs 30
decwave W40_OneNMR- th 7
_w018 ai cdc ph
dpwr 37
dmf 32258
```

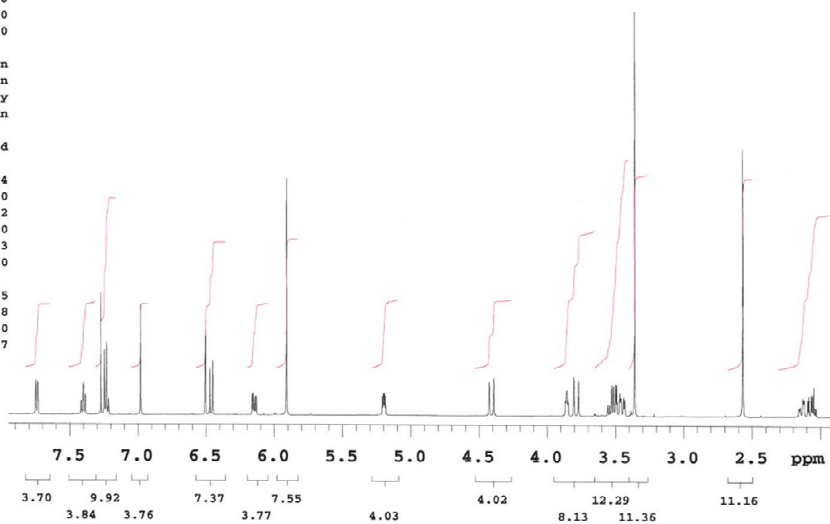

# <sup>13</sup>C-NMR

exp50 CARBON

```
SAMPLE      PRESATURATION
date Jun 27 2016 satmode n
solvent cdcl3 wet n
file /home/vnmr1/v- SPECIAL
nmrsys/data/Zalchy- temp 25.0
/2016/Hrabalek-160- gain 30
825/Nemecek_Jan/Bo- spin 20
tanika/HN-278A_C.f- hst 0.008
id pw90 11.300
ACQUISITION alfa 10.000
sw 31250.0 FLAGS
at 1.049 il n
np 65536 in n
fb 17000 dp y
bs 1 hs nn
d1 1.000 PROCESSING
nt 1000 lb 1.00
ct 186 fn not used
TRANSMITTER DISPLAY
tn C13 sp 2408.3
sfrq 125.705 wp 19443.5
tof 1913.9 rfl 11486.1
tpwr 55 rfp 9678.2
pw 5.650 rp -58.7
DECOUPLER lp 0
dn H1 PLOT
dof 0 wc 175
dm yyy sc 8
decwave w vs 23
dpwr 41 th 5
dmf 12346 nm cdc ph
```

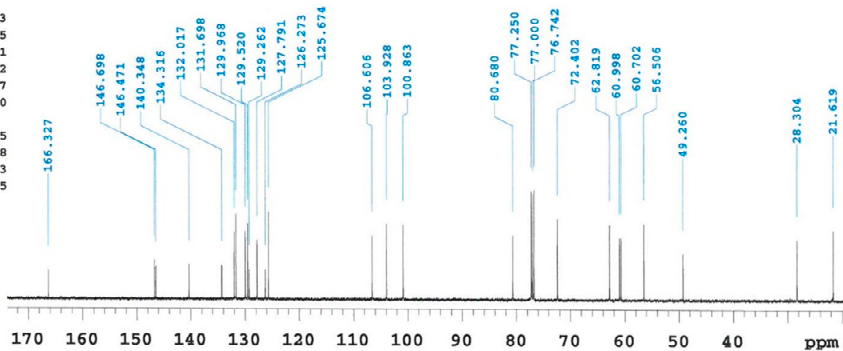

# 11-O-(3-methoxybenzoyl)haemanthamine (1k)

## ESI-HRMS

436.1760

2017 11 16 LC-61 INJ1 1368 (2.345) Cm (1361:1379-(1212:1312+1458:1564))

1: TOF MS ES+  
9.74e6

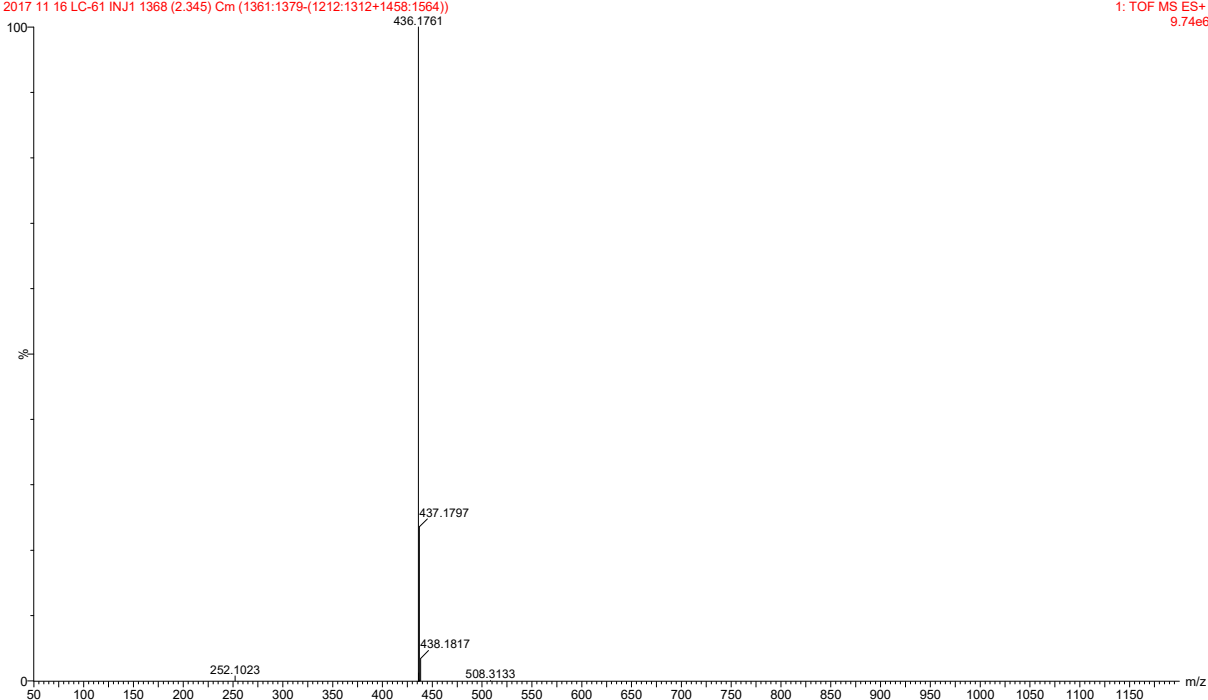

## EI-MS

File :C:\msdchem\1\data\SNAP\3351LC.D  
Operator : Lucka  
Acquired : 19 Jan 2017 17:22 using AcqMethod LUCKA\_7.M  
Instrument : GCMS  
Sample Name: LC-61  
Misc Info :  
Vial Number: 6

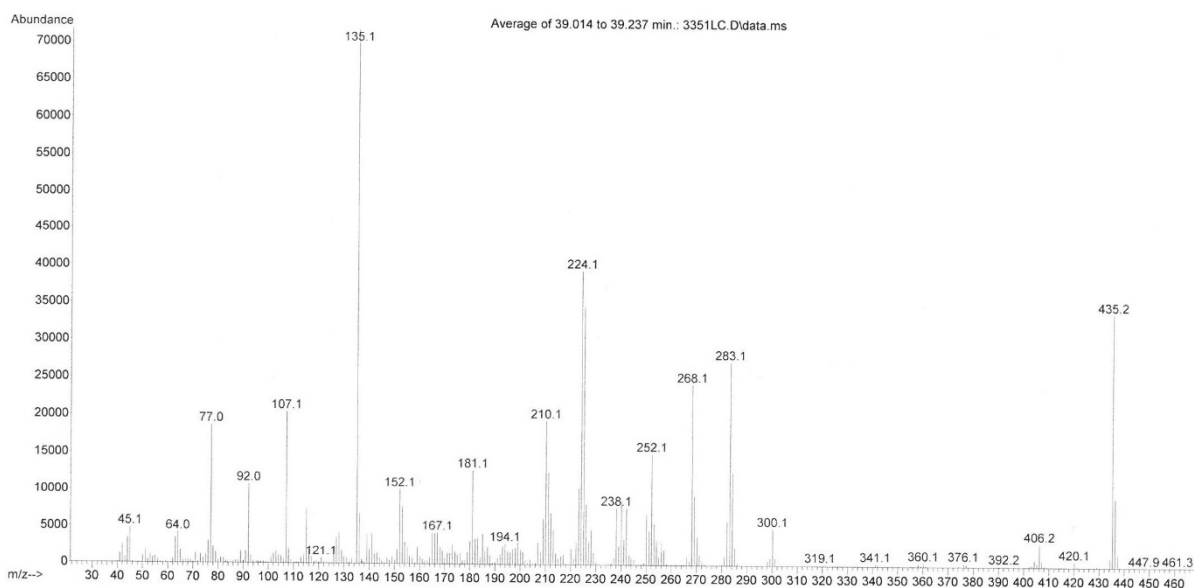

# <sup>1</sup>H-NMR

exp8 PROTON

```
SAMPLE      PRESATURATION
date Mar 24 2017 satmode n
solvent cdcl3 wet n
file exp SPECIAL
ACQUISITION temp 25.0
sw 8012.8 gain 22
at 2.045 spin 20
np 32768 hst 0.008
fb 4000 pw90 9.100
bs 32 alfa 10.000
dl 1.000 FLAGS
nt 8 il n
ct 8 in n
TRANSMITTER dp y
tn H1 hs nn
sfrq 499.866 PROCESSING
tof 499.9 fn not used
tpwr 60 DISPLAY
pw 4.550 sp 529.9
DECOUPLER wp 3426.9
dn C13 rfl 1007.2
dof 0 rfp 0
dn nnn rp 163.2
decwave W40_OneNMR~ lp 0
_W018 PLOT
dpwr 37 wc 190
dmf 32258 sc 8
ve 33
th 7
ai cdc ph
```

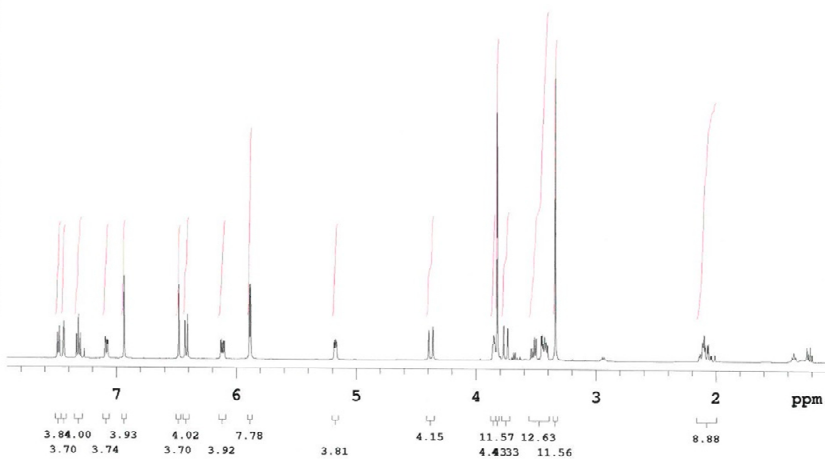

# <sup>13</sup>C-NMR

exp7 CARBON

```
SAMPLE      PRESATURATION
date Mar 24 2017 satmode n
solvent cdcl3 wet n
file exp SPECIAL
ACQUISITION temp 25.0
sw 31250.0 gain 30
at 1.049 spin 20
np 65536 hst 0.008
fb 17000 pw90 11.300
bs 1 alfa 10.000
dl 1.000 FLAGS
nt 1000 il n
ct 620 in n
TRANSMITTER dp y
tn C13 hs nn
sfrq 125.705 PROCESSING
tof 1913.9 lb 1.00
tpwr 55 fn not used
pw 5.650 DISPLAY
DECOUPLER sp 1105.6
dn H1 wp 20169.3
dof 0 rfl 11489.9
dn yyy rfp 9678.2
decwave w rp 135.4
dpwr 40 lp 0
dmf 11173 PLOT
wc 190
sc 0
vs 14
th 2
nm cdc ph
```

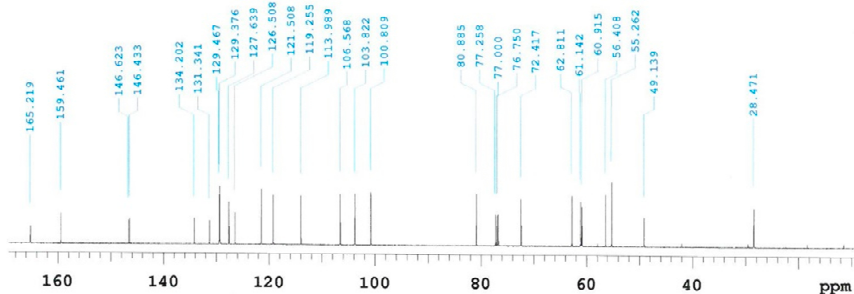

# 11-O-(4-nitrobenzoyl)haemanthamine (1m)

## ESI-HRMS

451.1505

2017 11 16 JB-1 INJ3 1373 (2.352) Cm (1363:1384-(1164:1274+1460:1555))

1: TOF MS ES+  
1.49e7

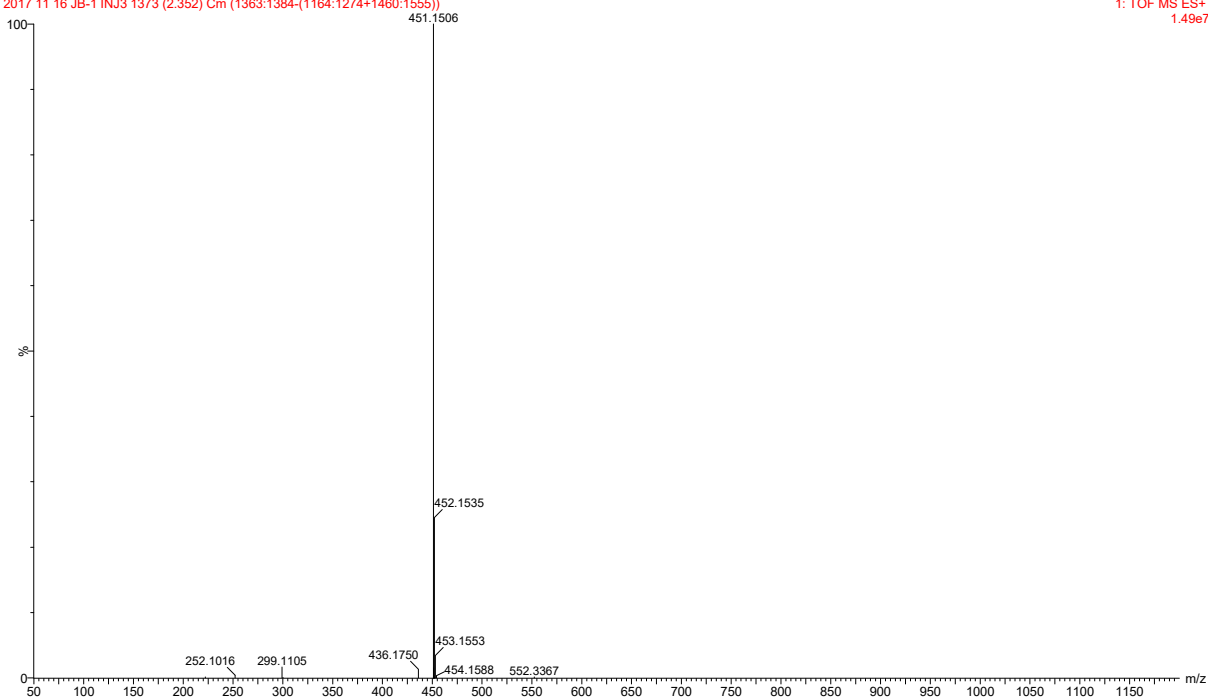

## EI-MS

No ionization under EI-MS conditions

## <sup>1</sup>H-NMR

exp51 PROTON

| SAMPLE              |                | PRESATURATION |          |
|---------------------|----------------|---------------|----------|
| date                | Nov 13 2015    | satmode       | n        |
| solvent             | cdcl3          | wet           | n        |
| file                | /home/vnmr1/v- | SPECIAL       |          |
| nmrays/data/Zalohy- | temp           | 25.0          |          |
| /2016/Hrabalek-160- | gain           | 30            |          |
| 825/Nemecek_Jan/Bo- | spin           | not used      |          |
| tanika/JB-1_H.fid   | hst            | 0.008         |          |
| ACQUISITION         |                | pw90          | 9.100    |
| sw                  | 8012.8         | alfa          | 10.000   |
| at                  | 2.045          | FLAGS         |          |
| np                  | 32768          | il            | n        |
| fb                  | 4000           | in            | n        |
| bs                  | 32             | dp            | y        |
| dl                  | 1.000          | hs            | nn       |
| nt                  | 8              | PROCESSING    |          |
| ct                  | 8              | fn            | not used |
| TRANSMITTER         |                | DISPLAY       |          |
| tn                  | H1             | sp            | -72.1    |
| sfrq                | 499.866        | wp            | 4394.7   |
| tof                 | 499.9          | rfl           | 1007.2   |
| tpwr                | 60             | rfp           | 0        |
| pw                  | 4.550          | rp            | 3.4      |
| DECOUPLER           |                | lp            | 0        |
| dn                  | C13            | PLOT          |          |
| dof                 | 0              | wc            | 190      |
| dm                  | nn             | sc            | 8        |
| decwave             | W40_OneNMR-    | vs            | 73       |
|                     | _W018          | th            | 7        |
| dpwr                | 37             | ai            | cdc ph   |
| daf                 | 32258          |               |          |

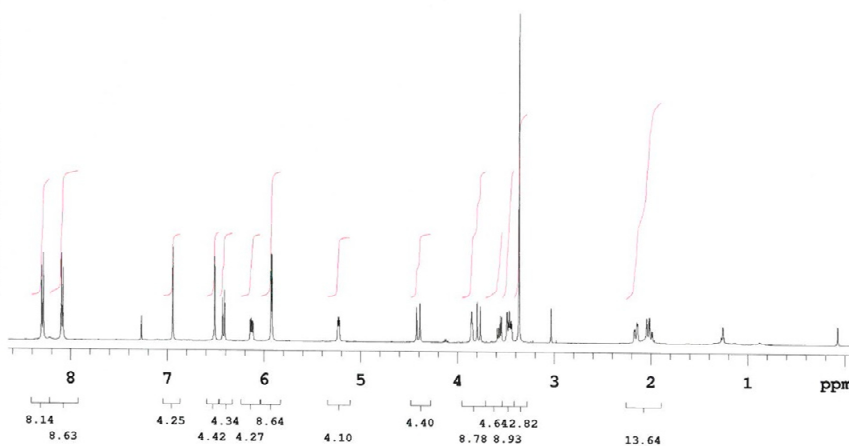



# <sup>13</sup>C-NMR

exp51 CARBON

```
SAMPLE          PRESATURATION
date Nov 13 2015 satmode n
solvent cdcl3   wet      n
file /home/vnmr1/vnmrsys/data/Zalchy-
/2016/Hrabalek-160-
825/Memecek_Jan/Bo-
tanika/JB-1_C.fid hst     0.008
ACQUISITION    pw90     11.300
sw 31250.0      alfa     10.000
at 1.049
np 65536        il       n
fb 17000        in       n
be 1            dp       y
dl 1.000        hs       nn
nt 1000
ct 380          lb       1.00
TRANSMITTER    fn       not used
tn C13
sfrq 125.705    sp       2923.3
tof 1913.9      wp       18513.7
tpwr 55         rfl      11480.3
pw 5.650        rfp      9678.2
DECOUPLER     rp       177.0
dn H1           lp       0
dof 0
dm          yyy      wc       190
decwave w       sc       8
dpwr 41        vs       30
dmf 12346     th       2
nm cdc ph
```

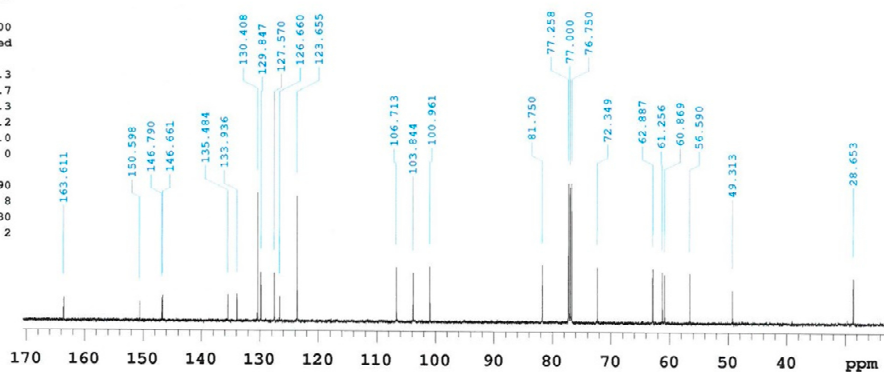

**Table S1.** Permeability ( $Pe$   $10^{-6}$   $\text{cm s}^{-1}$ ) in the PAMPA-BBB assay for 10 commercial drugs (used in the experiment validation) and compounds **1g**, **1j** and **1m** with their predictive penetration in the CNS.<sup>a</sup>

| Compound       | Bibl. <sup>b</sup> | $Pe$ ( $10^{-6}$ $\text{cm s}^{-1}$ ) <sup>c</sup> | Prediction |
|----------------|--------------------|----------------------------------------------------|------------|
| Atenolol       | 0,8                | 0,3 $\pm$ 0,3                                      |            |
| Caffeine       | 1,3                | 0,1 $\pm$ 0,1                                      |            |
| Desipramine    | 12                 | 7,7 $\pm$ 0,4                                      |            |
| Enoxacin       | 0,9                | 0,6 $\pm$ 0,5                                      |            |
| Hydrocortisone | 1,9                | 0,8 $\pm$ 0,2                                      |            |
| Ofloxacin      | 0,8                | 0,3 $\pm$ 0,1                                      |            |
| Piroxicam      | 2,5                | 0,9 $\pm$ 0,2                                      |            |
| Promazine      | 8,8                | 8,6 $\pm$ 0,5                                      |            |
| Testosterone   | 17                 | 13,6 $\pm$ 0,3                                     |            |
| Verapamil      | 16                 | 15,5 $\pm$ 0,8                                     |            |
| <b>18g</b>     |                    | 8,4 $\pm$ 0,2                                      | CNS +      |
| <b>18j</b>     |                    | 5,8 $\pm$ 0,9                                      | CNS +      |
| <b>18m</b>     |                    | 7,1 $\pm$ 0,3                                      | CNS +      |

<sup>a</sup>PBS:EtOH (70:30) was used as solvent. <sup>b</sup>Reference Di et al. <sup>c</sup>Data are the mean  $\pm$  SD of 2 independent experiments.

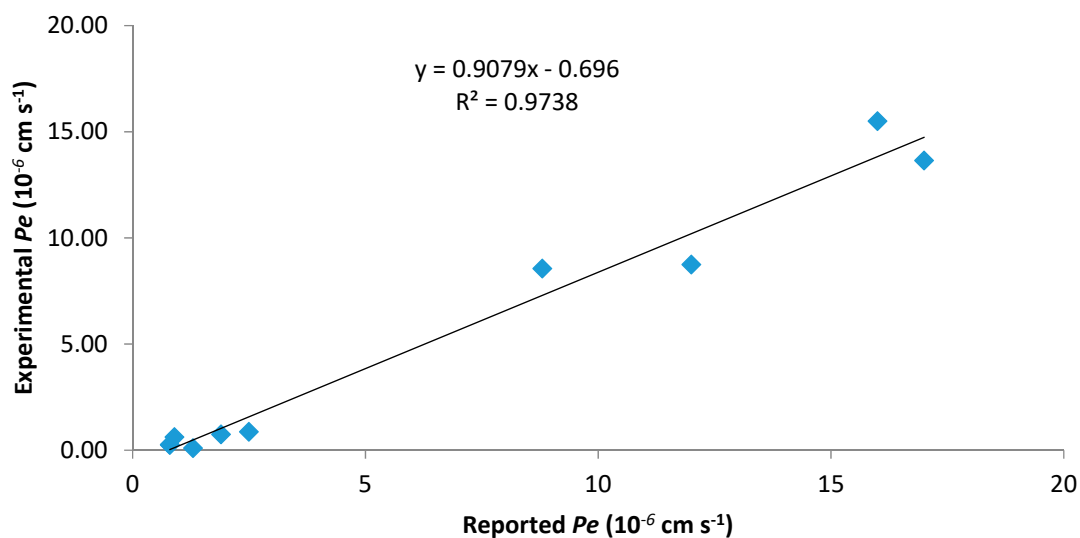

**Figure S1.** Linear correlation between experimental and reported permeability of commercial drugs using the PAMPA-BBB assay.

**Table S2.** Cell proliferation of haemanthamine derivatives (**1a – 1m**; c = 10 $\mu$ M) for 10 human cell lines.

|               | <b>1</b>   | <b>1a</b>    | <b>1b</b>    | <b>1c</b>   | <b>1d</b>  | <b>1e</b>   | <b>1f</b>    | <b>1g</b>    | <b>1</b>     | <b>1i</b>    | <b>1j</b>    | <b>1k</b>   | <b>1m</b>   | <b>DOX</b>  |
|---------------|------------|--------------|--------------|-------------|------------|-------------|--------------|--------------|--------------|--------------|--------------|-------------|-------------|-------------|
| <b>Jurkat</b> | 13 $\pm$ 3 | 100 $\pm$ 13 | 104 $\pm$ 3  | 110 $\pm$ 3 | 92 $\pm$ 1 | 100 $\pm$ 7 | 90 $\pm$ 12  | 83 $\pm$ 11  | 69 $\pm$ 6   | 133 $\pm$ 10 | 95 $\pm$ 11  | 83 $\pm$ 1  | 69 $\pm$ 7  | 0 $\pm$ 3   |
| <b>MOLT-4</b> | 1 $\pm$ 1  | 106 $\pm$ 9  | 97 $\pm$ 8   | 99 $\pm$ 8  | 96 $\pm$ 1 | 97 $\pm$ 3  | 101 $\pm$ 18 | 110 $\pm$ 19 | 135 $\pm$ 22 | 115 $\pm$ 15 | 91 $\pm$ 3   | 94 $\pm$ 18 | 76 $\pm$ 12 | 0 $\pm$ 1   |
| <b>A549</b>   | 30 $\pm$ 6 | 95 $\pm$ 9   | 84 $\pm$ 3   | 84 $\pm$ 3  | 99 $\pm$ 7 | 105 $\pm$ 9 | 106 $\pm$ 12 | 98 $\pm$ 2   | 75 $\pm$ 25  | 122 $\pm$ 5  | 96 $\pm$ 8   | 102 $\pm$ 5 | 74 $\pm$ 6  | 66 $\pm$ 16 |
| <b>HT-29</b>  | 37 $\pm$ 6 | 97 $\pm$ 10  | 79 $\pm$ 15  | 82 $\pm$ 17 | 94 $\pm$ 4 | 100 $\pm$ 3 | 101 $\pm$ 3  | 110 $\pm$ 17 | 97 $\pm$ 23  | 120 $\pm$ 4  | 98 $\pm$ 6   | 93 $\pm$ 3  | 73 $\pm$ 2  | 77 $\pm$ 12 |
| <b>PANC-1</b> | 37 $\pm$ 3 | 114 $\pm$ 4  | 70 $\pm$ 13  | 85 $\pm$ 13 | 88 $\pm$ 3 | 96 $\pm$ 4  | 99 $\pm$ 6   | 100 $\pm$ 10 | 118 $\pm$ 9  | 108 $\pm$ 2  | 95 $\pm$ 6   | 88 $\pm$ 5  | 71 $\pm$ 7  | 59 $\pm$ 9  |
| <b>A2780</b>  | 30 $\pm$ 5 | 107 $\pm$ 17 | 104 $\pm$ 3  | 123 $\pm$ 9 | 99 $\pm$ 2 | 106 $\pm$ 5 | 104 $\pm$ 8  | 120 $\pm$ 10 | 122 $\pm$ 24 | 162 $\pm$ 9  | 129 $\pm$ 11 | 108 $\pm$ 7 | 86 $\pm$ 4  | 5 $\pm$ 1   |
| <b>HeLa</b>   | 16 $\pm$ 2 | 83 $\pm$ 6   | 69 $\pm$ 11  | 74 $\pm$ 8  | 93 $\pm$ 6 | 98 $\pm$ 3  | 88 $\pm$ 3   | 98 $\pm$ 2   | 72 $\pm$ 4   | 93 $\pm$ 5   | 104 $\pm$ 4  | 84 $\pm$ 12 | 71 $\pm$ 1  | 7 $\pm$ 10  |
| <b>MCF-7</b>  | 11 $\pm$ 1 | 97 $\pm$ 19  | 85 $\pm$ 7   | 103 $\pm$ 7 | 93 $\pm$ 5 | 95 $\pm$ 4  | 96 $\pm$ 13  | 108 $\pm$ 10 | 90 $\pm$ 11  | 105 $\pm$ 4  | 112 $\pm$ 3  | 100 $\pm$ 2 | 62 $\pm$ 10 | 41 $\pm$ 7  |
| <b>SAOS-2</b> | 28 $\pm$ 3 | 88 $\pm$ 6   | 96 $\pm$ 16  | 85 $\pm$ 15 | 88 $\pm$ 6 | 96 $\pm$ 8  | 104 $\pm$ 7  | 104 $\pm$ 9  | 135 $\pm$ 6  | 97 $\pm$ 10  | 97 $\pm$ 17  | 89 $\pm$ 15 | 69 $\pm$ 4  | 73 $\pm$ 8  |
| <b>MRC-5</b>  | 30 $\pm$ 2 | 113 $\pm$ 12 | 102 $\pm$ 13 | 95 $\pm$ 7  | 89 $\pm$ 3 | 96 $\pm$ 4  | 87 $\pm$ 14  | 101 $\pm$ 5  | 100 $\pm$ 5  | 105 $\pm$ 3  | 112 $\pm$ 9  | 92 $\pm$ 1  | 61 $\pm$ 8  | 40 $\pm$ 4  |

Values represent cell proliferation after haemanthamine analogue treatment and are expressed as percent of proliferation of untreated control cells. Each value is a mean of three independent experiments. Doxorubicin was used as a reference drug.
